# Supplementary material
Source: PubMed Central journal article supplement (PMC3811862)
Supplement: MCB.05772-11_zmb999100135so1.pdf [file MCB.05772-11_zmb999100135so1.pdf]

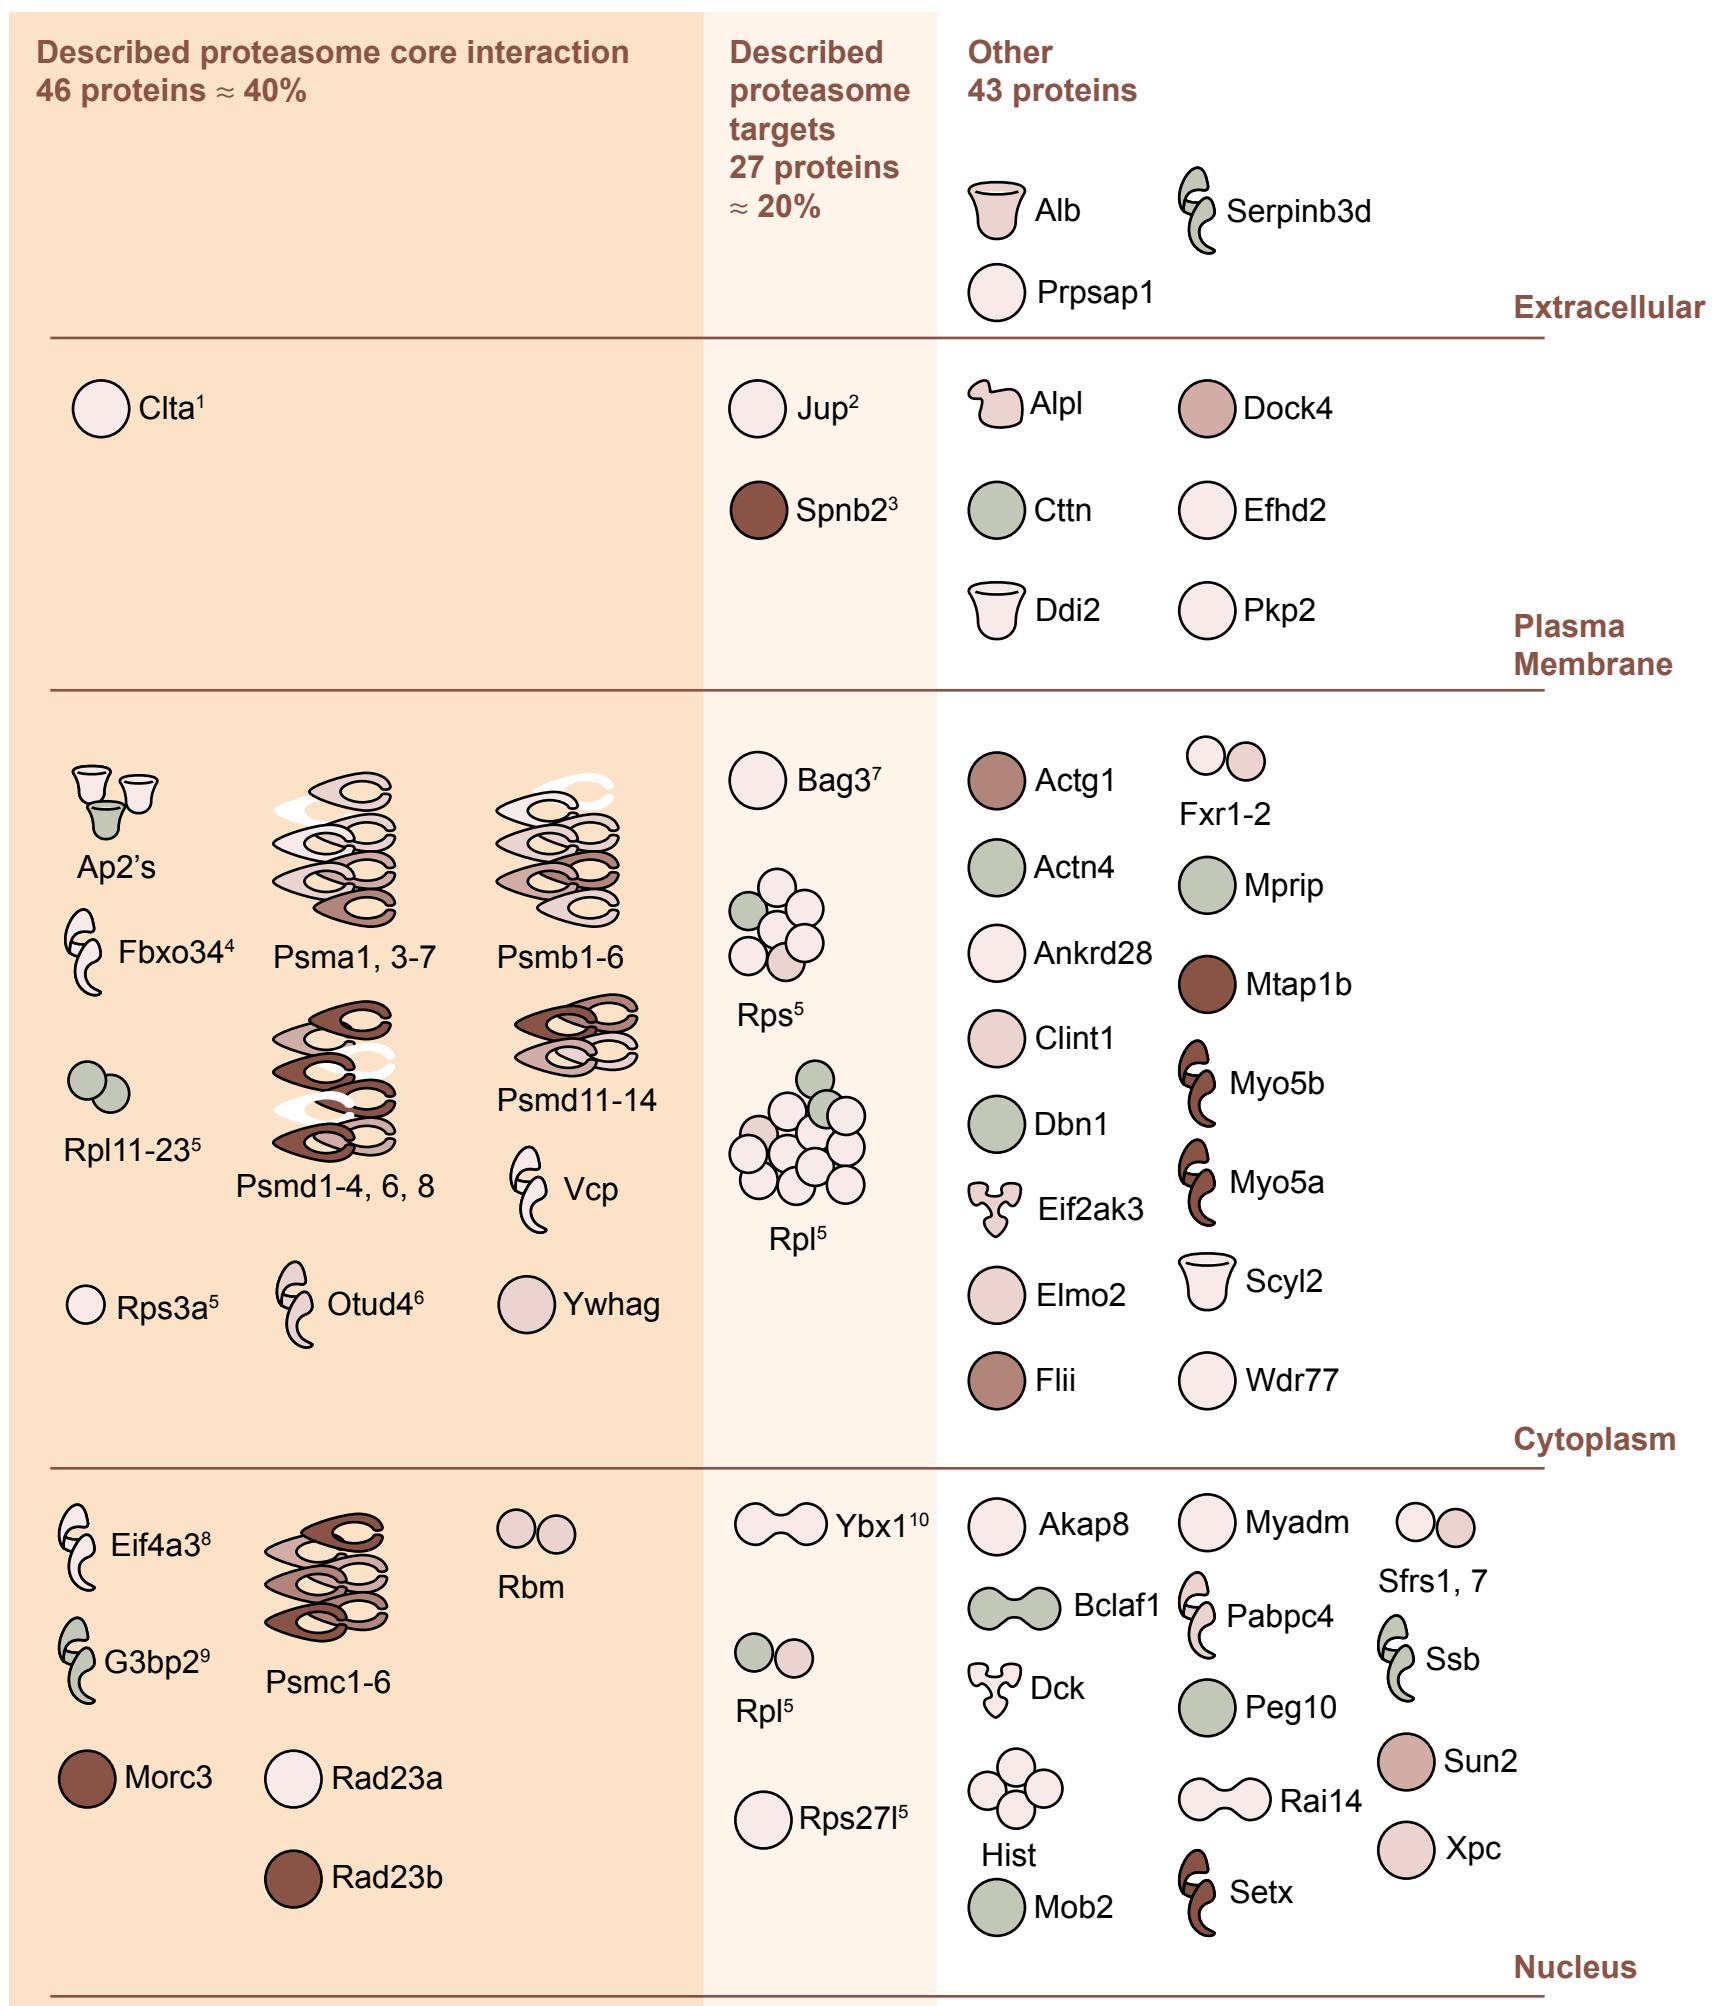

**Mascot Score**

-  < 100
-  100-300
-  300-500
-  500-700
-  700-900
-  > 900

**Function**

-  Transporter
-  Phosphatase
-  Peptidase
-  Kinase
-  Enzyme
-  Transcription Regulator
-  Other

**Legend**

- Ap Adaptor protein
- Hist Histones
- Psm Proteasome
- Rbm RNA binding motif
- Rp Ribosomal protein

**Figure S1**

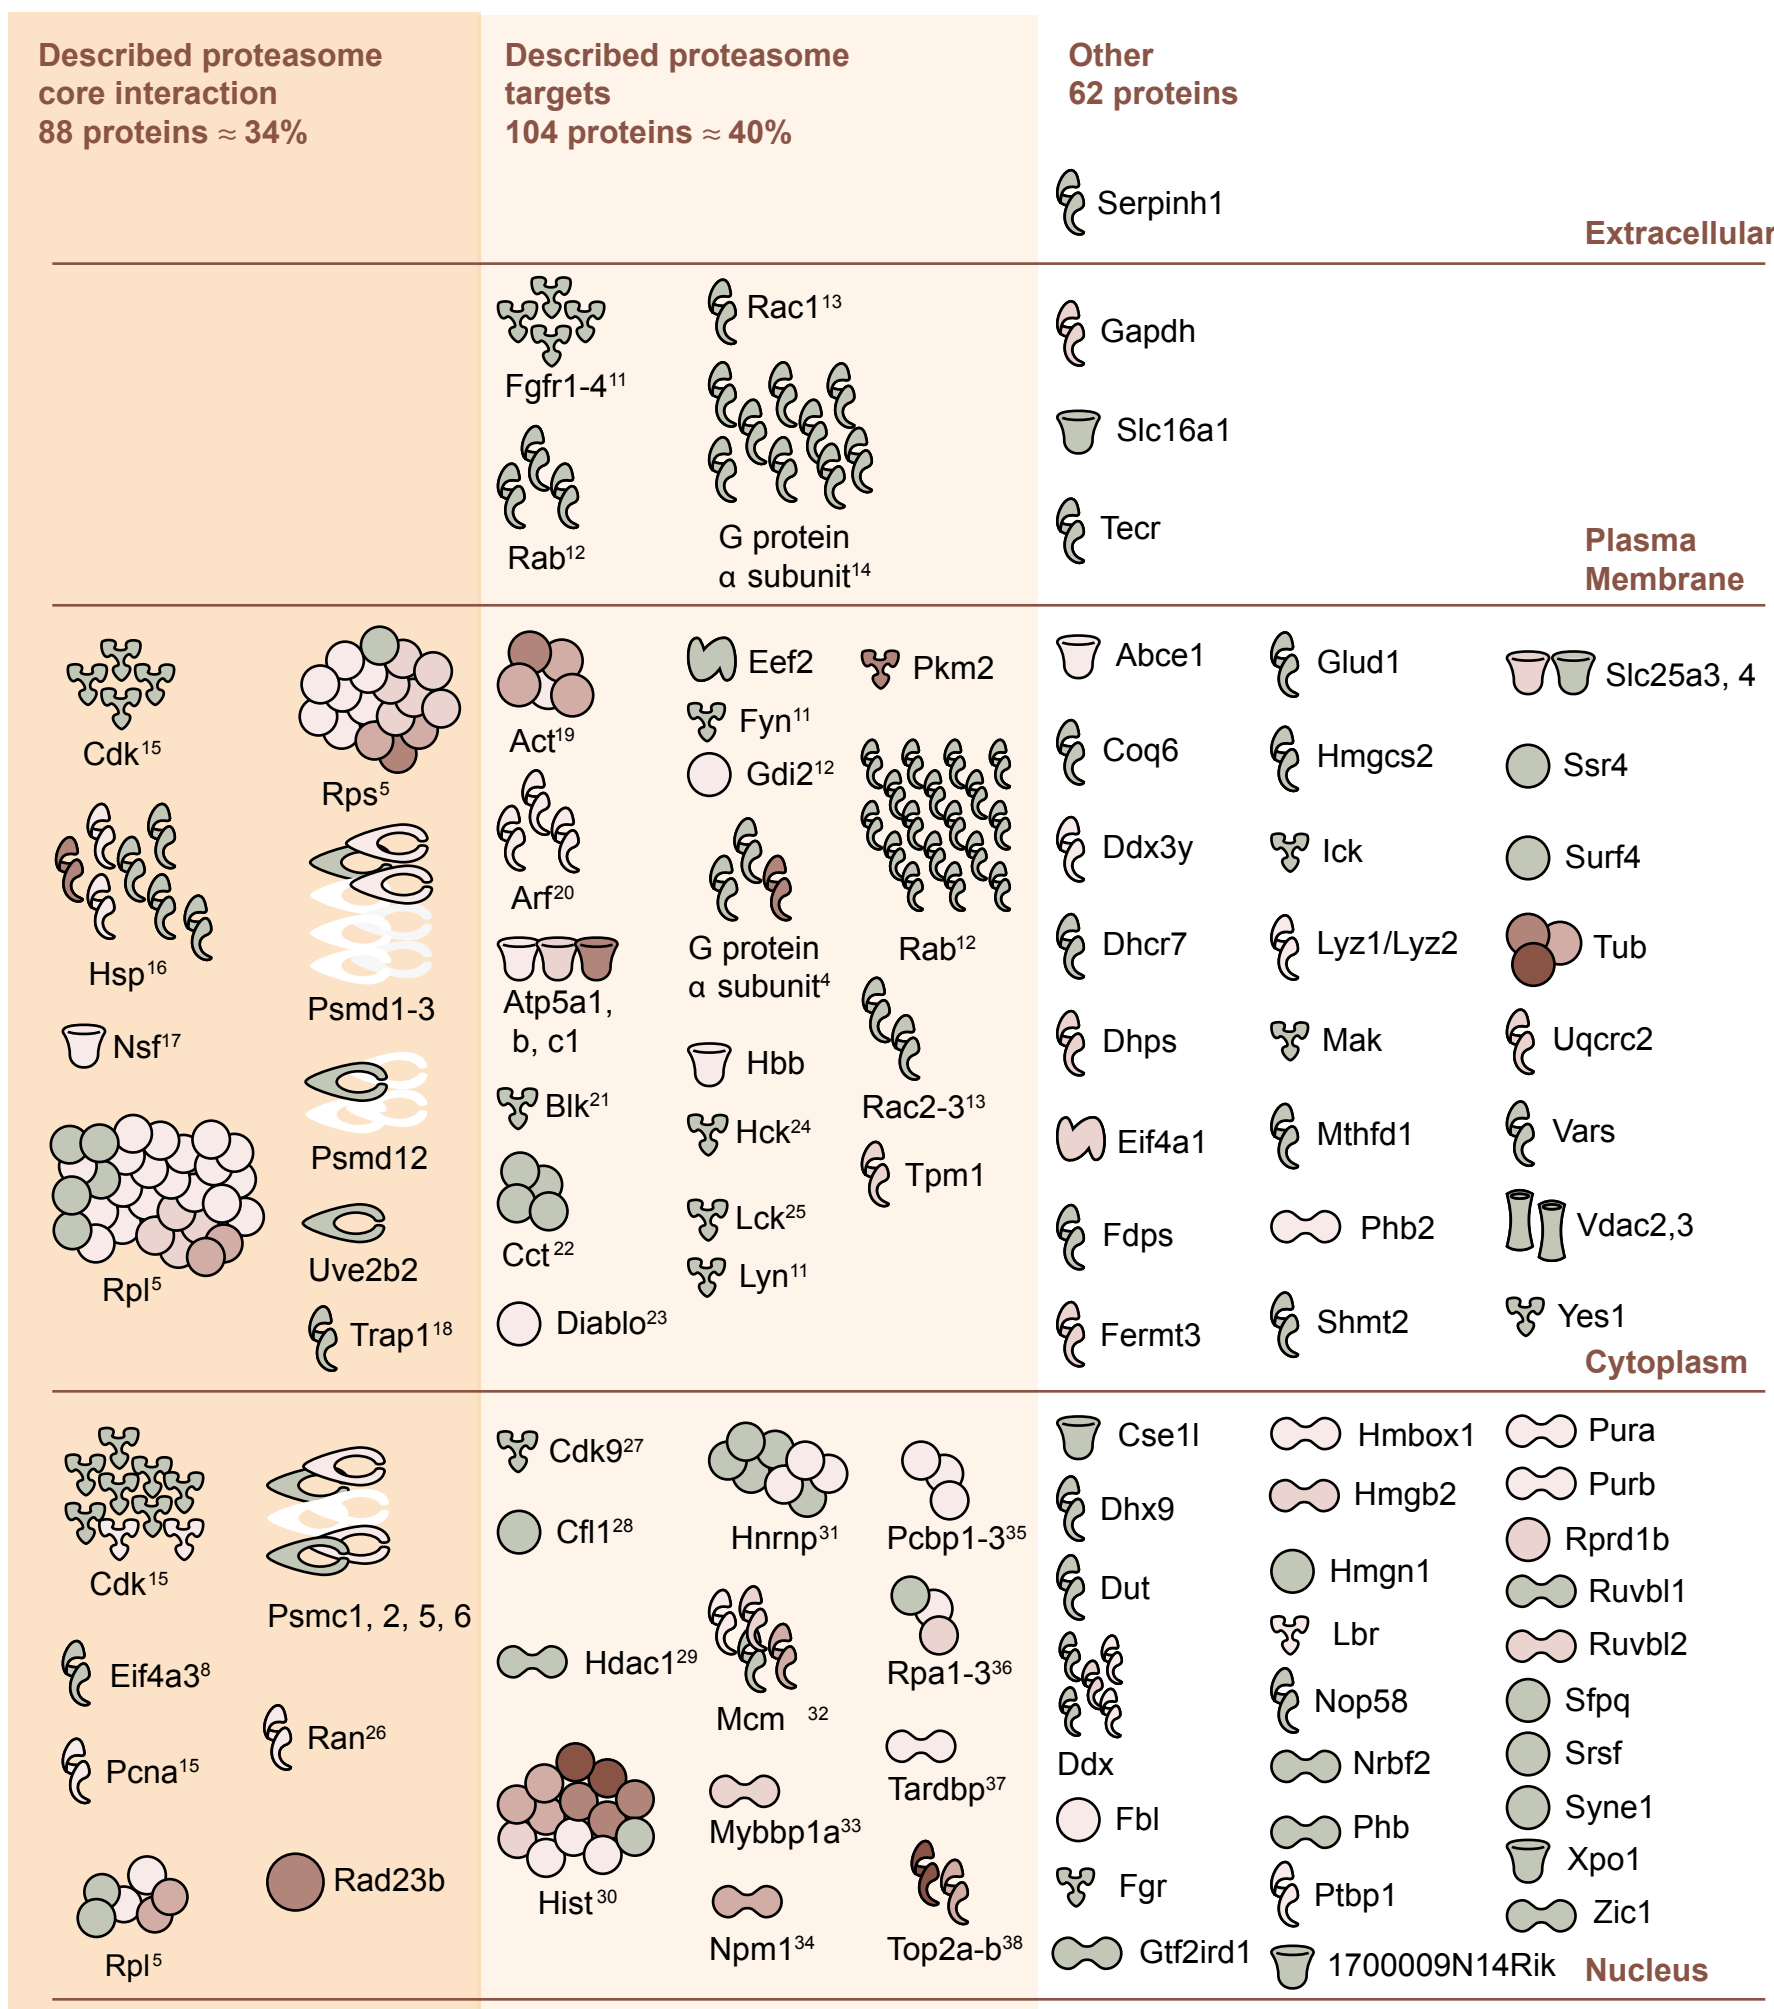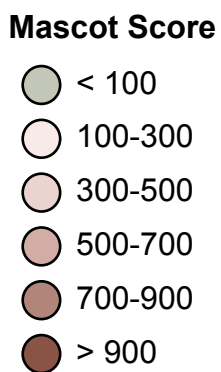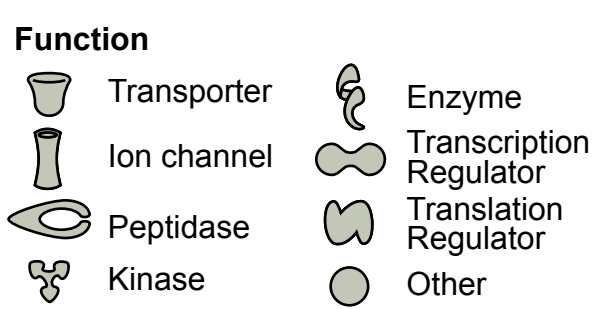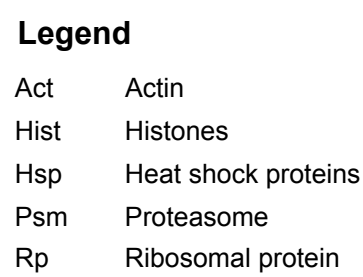

**Figure S2**

## **SUPPLEMENTARY FIGURE LEGENDS**

FIG S1: Scheme of the Rad23b interactome in embryonic stem cells

Depiction of the Rad23b interactome identified in two independent ES clones expressing Rad23b-YFP-FLAG. Refer to Table S1 for detailed GO Terms and Mascot Scores; Table S2 for Ingenuity Pathways; and Table S3 for supporting literature used for classification of Rad23b interacting partners. Proteins depicted in white are part of the indicated complexes but were not picked up as significant in the Rad23b interactome.

FIG. S2: Scheme of the Rad23b interactome in erythroid cells

Depiction of the Rad23b interactome identified in I/11 and fetal liver derived erythroid cells. Refer to Table S4 for detailed GO Terms and Mascot Scores; Table S5 for Ingenuity Pathways; and Table S3 for supporting literature used for classification of Rad23b interacting partners. Proteins depicted in white are part of the indicated complexes but were not picked up as significant in the Rad23b interactome.

| Symbol   | Entrez Gene Name                                                                          | F11 score | B11 Score | GO biological process                                    |
|----------|-------------------------------------------------------------------------------------------|-----------|-----------|----------------------------------------------------------|
| Actn4    | actinin, alpha 4                                                                          | 95        | 132       | GO:0001666 response to hypoxia                           |
| Psmc4    | proteasome 26S subunit, ATPase, 4                                                         | 682       | 776       | GO:0001824 blastocyst development                        |
| Xpc      | xeroderma pigmentosum, complementation group C                                            | 307       | 125       | GO:0006281 DNA repair                                    |
| Rad23a   | RAD23 homolog A ( <i>S. cerevisiae</i> )                                                  | 64        | 101       | GO:0006289 nucleotide-excision repair                    |
| Setx     | senataxin                                                                                 | 3339      | 1817      | GO:0006302 double-strand break repair                    |
| Hist1h1d | histone cluster 1, H1d                                                                    | 218       | 158       | GO:0006334 nucleosome assembly                           |
| Hist1h1e | histone cluster 1, H1e                                                                    | 218       | 158       | GO:0006355 regulation of transcription, DNA-dependent    |
| Ybx1     | Y box binding protein 1                                                                   | 255       | 253       | GO:0006364 rRNA processing                               |
| Eif4a3   | eukaryotic translation initiation factor 4A3                                              | 223       | 174       | GO:0006396 RNA processing                                |
| Ssb      | Sjogren syndrome antigen B (autoantigen La)                                               | 92        | 89        |                                                          |
| Pabpc4   | poly(A) binding protein, cytoplasmic 4 (inducible form)                                   | 408       | 246       |                                                          |
| Rpl10a   | ribosomal protein L10A                                                                    | 184       | 170       |                                                          |
| Rpl11    | ribosomal protein L11                                                                     | 60        | 51        |                                                          |
| Rpl12    | ribosomal protein L12                                                                     | 262       | 242       |                                                          |
| Rpl13    | ribosomal protein L13                                                                     | 195       | 210       |                                                          |
| Rpl13a   | ribosomal protein L13a                                                                    | 148       | 93        |                                                          |
| Rpl19    | ribosomal protein L19                                                                     | 142       | 137       |                                                          |
| Rpl23    | ribosomal protein L23                                                                     | 75        | 81        |                                                          |
| Rpl27    | ribosomal protein L27                                                                     | 60        | 50        |                                                          |
| Rpl27a   | ribosomal protein L27a                                                                    | 81        | 83        |                                                          |
| Rpl3     | ribosomal protein L3                                                                      | 210       | 78        |                                                          |
| Rpl4     | ribosomal protein L4                                                                      | 180       | 162       | GO:0006412 translation                                   |
| Rpl6     | ribosomal protein L6                                                                      | 279       | 172       |                                                          |
| Rpl7     | ribosomal protein L7                                                                      | 155       | 175       |                                                          |
| Rpl8     | ribosomal protein L8                                                                      | 64        | 58        |                                                          |
| Rps11    | ribosomal protein S11                                                                     | 127       | 53        |                                                          |
| Rps16    | ribosomal protein S16                                                                     | 130       | 85        |                                                          |
| Rps23    | ribosomal protein S23                                                                     | 60        | 51        |                                                          |
| Rps26    | ribosomal protein S26                                                                     | 147       | 76        |                                                          |
| Rps27    | ribosomal protein S27                                                                     | 121       | 80        |                                                          |
| Rps27l   | ribosomal protein S27-like                                                                | 121       | 80        |                                                          |
| Rps6     | ribosomal protein S6                                                                      | 389       | 147       |                                                          |
| Scyl2    | SCY1-like 2 ( <i>S. cerevisiae</i> )                                                      | 242       | 97        | GO:0006468 protein amino acid phosphorylation            |
| Ddi2     | DNA-damage inducible 1 homolog 2 ( <i>S. cerevisiae</i> )                                 | 183       | 168       | GO:0006508 proteolysis                                   |
| Psm8     | proteasome 26S subunit, non-ATPase, 8                                                     | 280       | 390       |                                                          |
| Psm1     | proteasome subunit, alpha type, 1                                                         | 367       | 476       |                                                          |
| Psm4     | proteasome subunit, alpha type, 4                                                         | 315       | 297       | GO:0006511 ubiquitin-dependent protein catabolic process |
| Psm5     | proteasome subunit, alpha type, 5                                                         | 130       | 318       |                                                          |
| Psm7     | proteasome subunit, alpha type, 7                                                         | 713       | 679       |                                                          |
| Ywhag    | tyrosine 3-monooxygenase/tryptophan 5-monooxygenase activation protein, gamma polypeptide | 312       | 226       | GO:0006605 protein targeting                             |
| G3bp2    | GTPase activating protein (SH3 domain) binding protein 2                                  | 52        | 48        | GO:0006810 transport                                     |
| Ap2a2    | adaptor-related protein complex 2, alpha 2 subunit                                        | 165       | 257       | GO:0006886 intracellular protein transport               |
| Ap2m1    | adaptor-related protein complex 2, mu 1 subunit                                           | 59        | 55        |                                                          |
| Clint1   | clathrin interactor 1                                                                     | 406       | 336       | GO:0006897 endocytosis                                   |
| Elmo2    | engulfment and cell motility 2                                                            | 315       | 130       | GO:0006909 phagocytosis                                  |
| Bag3     | BCL2-associated athanogene 3                                                              | 70        | 171       | GO:0006916 anti-apoptosis                                |
| Sun2     | Sad1 and UNC84 domain containing 2                                                        | 745       | 519       | GO:0006998 Nuclear envelope organisation                 |
| Akap8    | A kinase (PRKA) anchor protein 8                                                          | 130       | 118       | GO:0007076 mitotic chromosome condensation               |
| Psm13    | proteasome 26S subunit, non-ATPase, 13                                                    | 559       | 666       | GO:0007127 meiosis I                                     |
| Dock4    | dedicator of cytokinesis 4                                                                | 665       | 210       | GO:0007165 signal transduction                           |
| Spnb2    | spectrin, beta, non-erythrocytic 1                                                        | 851       | 921       | GO:0007184 SMAD protein nuclear translocation            |
| Myo5a    | myosin VA (heavy chain 12, myosin)                                                        | 3022      | 1881      | GO:0007268 synaptic transmission                         |
| Ap2b1    | adaptor-related protein complex 2, beta 1 subunit                                         | 146       | 110       | GO:0007269 neurotransmitter secretion                    |

|          |                                                              |      |      |            |                                                                                                |
|----------|--------------------------------------------------------------|------|------|------------|------------------------------------------------------------------------------------------------|
| Actg1    | actin, gamma 1                                               | 754  | 769  | GO:0007409 | axonogenesis                                                                                   |
| Mtap1b   | microtubule-associated protein 1B                            | 1737 | 1018 | GO:0007416 | synapse assembly                                                                               |
| Rps9     | ribosomal protein S9                                         | 67   | 170  | GO:0008284 | positive regulation of cell proliferation                                                      |
| Wdr77    | WD repeat domain 77                                          | 213  | 217  | GO:0008285 | negative regulation of cell proliferation                                                      |
| Srsf7    | serine/arginine-rich splicing factor 7                       | 158  | 139  | GO:0008380 | RNA splicing                                                                                   |
| Prpsap1  | phosphoribosyl pyrophosphate synthetase-associated protein 1 | 196  | 102  | GO:0009165 | nucleotide biosynthetic process                                                                |
| Morc3    | MORC family CW-type zinc finger 3                            | 1584 | 578  | GO:0009791 | post-embryonic development                                                                     |
| Psmb2    | proteasome subunit, beta type, 2                             | 321  | 325  | GO:0014070 | response to organic cyclic substance                                                           |
| Myo5b    | myosin VB                                                    | 942  | 622  | GO:0015031 | protein transport                                                                              |
| Fbxo34   | F-box protein 34                                             | 140  | 147  |            |                                                                                                |
| Clta     | clathrin, light chain A                                      | 148  | 112  | GO:0016192 | vesicle-mediated transport                                                                     |
| Rai14    | retinoic acid induced 14                                     | 117  | 164  |            |                                                                                                |
| Pkp2     | plakophilin 2                                                | 210  | 86   | GO:0016337 | cell-cell adhesion                                                                             |
| Bclaf1   | BCL2-associated transcription factor 1                       | 85   | 65   | GO:0016481 | negative regulation of transcription                                                           |
| Psmc5    | proteasome 26S subunit, ATPase, 5                            | 895  | 1000 |            |                                                                                                |
| Hist1h1c | histone cluster 1, H1c                                       | 218  | 158  | GO:0016584 | nucleosome positioning                                                                         |
| Eif2ak3  | eukaryotic translation initiation factor 2-alpha kinase 3    | 346  | 280  | GO:0017148 | negative regulation of translation                                                             |
| Fxr1     | fragile X mental retardation, autosomal homolog 1            | 342  | 410  |            |                                                                                                |
| Rps3a    | ribosomal protein S3A                                        | 144  | 148  | GO:0030154 | cell differentiation                                                                           |
| Psmb3    | proteasome subunit, beta type, 3                             | 172  | 283  | GO:0030163 | protein catabolic process                                                                      |
| Psmc1    | proteasome 26S subunit, ATPase, 1                            | 585  | 600  |            |                                                                                                |
| Psmc2    | proteasome 26S subunit, ATPase, 2                            | 809  | 1019 |            |                                                                                                |
| Psmc3    | proteasome 26S subunit, ATPase, 3                            | 836  | 797  |            |                                                                                                |
| Psmc6    | proteasome 26S subunit, ATPase, 6                            | 490  | 606  |            |                                                                                                |
| Peg10    | paternally expressed 10                                      | 95   | 87   | GO:0030512 | negative regulation of transforming growth factor beta receptor signaling pathway              |
| Psmb5    | proteasome subunit, beta type, 5                             | 640  | 576  | GO:0031145 | anaphase-promoting complex-dependent proteasomal ubiquitin-dependent protein catabolic process |
| Psmd11   | proteasome 26S subunit, non-ATPase, 11                       | 795  | 1068 |            |                                                                                                |
| Psmd12   | proteasome 26S subunit, non-ATPase, 12                       | 825  | 863  |            |                                                                                                |
| Psmd4    | proteasome 26S subunit, non-ATPase, 4                        | 617  | 445  |            |                                                                                                |
| Psmd6    | proteasome 26S subunit, non-ATPase, 6                        | 675  | 957  |            |                                                                                                |
| Psmd1    | proteasome 26S subunit, non-ATPase, 1                        | 687  | 1061 | GO:0042176 | regulation of protein catabolic process                                                        |
| Psmd2    | proteasome 26S subunit, non-ATPase, 2                        | 1128 | 1186 |            |                                                                                                |
| Psmd3    | proteasome 26S subunit, non-ATPase, 3                        | 1329 | 1333 |            |                                                                                                |
| Rpl7a    | ribosomal protein L7A                                        | 315  | 268  | GO:0042254 | ribosome biogenesis                                                                            |
| Rplp0    | ribosomal protein, large, P0                                 | 371  | 456  |            |                                                                                                |
| Rpl14    | ribosomal protein L14                                        | 126  | 126  | GO:0042273 | ribosomal large subunit biogenesis                                                             |
| Rad23b   | RAD23 homolog B (S. cerevisiae)                              | 1194 | 1322 | GO:0043161 | proteasomal ubiquitin-dependent protein catabolic process                                      |
| Hist4h4  | histone cluster 4, H4                                        | 145  | 59   | GO:0045653 | negative regulation of megakaryocyte differentiation                                           |
| Rbm14    | RNA binding motif protein 14                                 | 130  | 188  | GO:0045944 | positive regulation of transcription from RNA polymerase II promoter                           |
| Dck      | deoxycytidine kinase                                         | 145  | 59   | GO:0046092 | deoxycytidine metabolic process                                                                |
| Alpl     | alkaline phosphatase, liver/bone/kidney                      | 402  | 98   | GO:0046677 | response to antibiotic                                                                         |
| Flii     | flightless I homolog (Drosophila)                            | 1135 | 469  | GO:0051014 | actin filament severing                                                                        |
| Jup      | junction plakoglobin                                         | 84   | 181  | GO:0051291 | protein heterooligomerization                                                                  |
| Psma3    | proteasome subunit, alpha type, 3                            | 216  | 215  | GO:0051603 | proteolysis involved in cellular protein catabolic process                                     |
| Psma6    | proteasome subunit, alpha type, 6                            | 484  | 627  |            |                                                                                                |
| Psmb1    | proteasome subunit, beta type, 1                             | 231  | 463  |            |                                                                                                |
| Psmb4    | proteasome subunit, beta type, 4                             | 62   | 256  |            |                                                                                                |
| Psmb6    | proteasome subunit, beta type, 6                             | 178  | 187  |            |                                                                                                |
| Sfrs1    | serine/arginine-rich splicing factor 1                       | 389  | 387  | GO:0060048 | cardiac muscle contraction                                                                     |

|           |                                                           |     |     |            |                                                     |
|-----------|-----------------------------------------------------------|-----|-----|------------|-----------------------------------------------------|
| Psm14     | proteasome 26S subunit, non-ATPase, 14                    | 311 | 492 | GO:0061136 | regulation of proteasomal protein catabolic process |
| Alb       | albumin                                                   | 511 | 386 | GO:0070541 | response to platinum ion                            |
| Vcp       | valosin-containing protein                                | 143 | 79  | GO:0070842 | aggresome assembly                                  |
| Ankrd28   | ankyrin repeat domain 28                                  | 202 | 99  |            |                                                     |
| Cttn      | cortactin                                                 | 95  | 104 |            |                                                     |
| Dbn1      | drebrin 1                                                 | 137 | 72  |            |                                                     |
| Efhd2     | EF-hand domain family, member D2                          | 324 | 170 |            |                                                     |
| Fxr2      | fragile X mental retardation, autosomal homolog 2         | 80  | 110 |            |                                                     |
| Mrip      | myosin phosphatase Rho interacting protein                | 75  | 88  |            |                                                     |
| Myadm     | myeloid-associated differentiation marker                 | 109 | 113 |            |                                                     |
| Otud4     | OTU domain containing 4                                   | 408 | 365 |            |                                                     |
| Rbm10     | RNA binding motif protein 10                              | 294 | 160 |            |                                                     |
| Serpinb3d | serpin peptidase inhibitor, clade B (ovalbumin), member 3 | 118 | 107 |            |                                                     |

**Table S1: GO Term Classification**

GO Term search ([www.ensembl.org/biomart](http://www.ensembl.org/biomart)) of Rad23b interacting proteins in ES cells. The Mascot Score from each ES cell clone (B11, F11) is indicated. Corresponds to Figure S1.

| Ingenuity Canonical Pathways                                    | <b>-log(p-value)</b> | <b>Ratio</b> | <b>Molecules</b>                                                                                                                                                                                              |
|-----------------------------------------------------------------|----------------------|--------------|---------------------------------------------------------------------------------------------------------------------------------------------------------------------------------------------------------------|
| Protein Ubiquitination Pathway                                  | 25.2                 | 0.1020       | Psmb3, Psma3, Psma7, Psmb6, Psmc5, Psmc6, Psmc14, Psmc2, Psmb4, Psma6, Psmb5, Psmc4, Psmc13, Psmc4, Psmc6, Psmc3, Psma1, Psmc8, Psmc11, Psmc1, Psmb2, Psmc2, Psmc12, Psma5, Psmc1, Psma4, Psmc1, Psmc4, Psmc3 |
| Purine Metabolism                                               | 4.23                 | 0.0228       | Psmc1, Dck, Psmc6, Prpsap1, Vcp, Psmc4, Psmc6, Psmc2, Psmc3, Psmc5                                                                                                                                            |
| GABA Receptor Signaling                                         | 3.51                 | 0.0714       | Ap2b1, Ap2m1, Myo5b, Ap2a2                                                                                                                                                                                    |
| Virus Entry via Endocytic Pathways                              | 3.40                 | 0.0500       | Ap2b1, Ap2m1, Clta, Actg1, Ap2a2                                                                                                                                                                              |
| Clathrin-mediated Endocytosis Signaling                         | 3.08                 | 0.0351       | Ap2b1, Ap2m1, Clta, Actg1, Ap2a2, Ctnn                                                                                                                                                                        |
| CTLA4 Signaling in Cytotoxic T Lymphocytes                      | 2.37                 | 0.0396       | Ap2b1, Ap2m1, Clta, Ap2a2                                                                                                                                                                                     |
| Granzyme A Signaling                                            | 2.12                 | 0.1000       | Hist1h1c, Hist1h1e                                                                                                                                                                                            |
| Nucleotide Excision Repair Pathway                              | 1.61                 | 0.0571       | Xpc, Rad23b                                                                                                                                                                                                   |
| Germ Cell-Sertoli Cell Junction Signaling                       | 1.61                 | 0.0238       | Jup, Actn4, Clint1, Actg1                                                                                                                                                                                     |
| Antigen Presentation Pathway                                    | 1.50                 | 0.0465       | Psmb5, Psmb6                                                                                                                                                                                                  |
| Agrin Interactions at Neuromuscular Junction                    | 1.09                 | 0.0290       | Actg1, Ctnn                                                                                                                                                                                                   |
| Caveolar-mediated Endocytosis Signaling                         | 1.03                 | 0.0235       | Alb, Actg1                                                                                                                                                                                                    |
| Taurine and Hypotaurine Metabolism                              | 1.00                 | 0.0213       | Myo5b                                                                                                                                                                                                         |
| Endoplasmic Reticulum Stress Pathway                            | 0.93                 | 0.0556       | Eif2ak3                                                                                                                                                                                                       |
| EIF2 Signaling                                                  | 0.91                 | 0.0192       | Rps6, Eif2ak3                                                                                                                                                                                                 |
| VEGF Signaling                                                  | 0.89                 | 0.0196       | Actn4, Actg1                                                                                                                                                                                                  |
| NRF2-mediated Oxidative Stress Response                         | 0.88                 | 0.0156       | Vcp, Eif2ak3, Actg1                                                                                                                                                                                           |
| Lipid Antigen Presentation by CD1                               | 0.88                 | 0.0435       | Ap2a2                                                                                                                                                                                                         |
| Fcy Receptor-mediated Phagocytosis in Macrophages and Monocytes | 0.87                 | 0.0196       | Myo5a, Actg1                                                                                                                                                                                                  |
| Folate Biosynthesis                                             | 0.85                 | 0.0125       | Alpl                                                                                                                                                                                                          |
| Leukocyte Extravasation Signaling                               | 0.84                 | 0.0151       | Actn4, Actg1, Ctnn                                                                                                                                                                                            |
| Protein Kinase A Signaling                                      | 0.79                 | 0.0123       | Hist1h1c, Ywhag, Hist1h1e, Akap8                                                                                                                                                                              |
| Antiproliferative Role of TOB in T Cell Signaling               | 0.78                 | 0.0385       | Pabpc4                                                                                                                                                                                                        |
| p70S6K Signaling                                                | 0.68                 | 0.0150       | Ywhag, Rps6                                                                                                                                                                                                   |
| Cellular Effects of Sildenafil (Viagra)                         | 0.64                 | 0.0132       | Pabpc4, Actg1                                                                                                                                                                                                 |
| Pentose Phosphate Pathway                                       | 0.63                 | 0.0112       | Prpsap1                                                                                                                                                                                                       |
| Glutamate Metabolism                                            | 0.63                 | 0.0128       | Myo5b                                                                                                                                                                                                         |
| Mechanisms of Viral Exit from Host Cells                        | 0.61                 | 0.0222       | Actg1                                                                                                                                                                                                         |
| Cell Cycle: G2/M DNA Damage Checkpoint Regulation               | 0.58                 | 0.0204       | Ywhag                                                                                                                                                                                                         |
| Alanine and Aspartate Metabolism                                | 0.58                 | 0.0114       | Myo5b                                                                                                                                                                                                         |
| MSP-RON Signaling Pathway                                       | 0.56                 | 0.0196       | Actg1                                                                                                                                                                                                         |
| $\beta$ -alanine Metabolism                                     | 0.51                 | 0.0102       | Myo5b                                                                                                                                                                                                         |
| Myc Mediated Apoptosis Signaling                                | 0.45                 | 0.0156       | Ywhag                                                                                                                                                                                                         |
| Butanoate Metabolism                                            | 0.45                 | 0.0076       | Myo5b                                                                                                                                                                                                         |
| ILK Signaling                                                   | 0.44                 | 0.0105       | Actn4, Actg1                                                                                                                                                                                                  |
| ERK5 Signaling                                                  | 0.43                 | 0.0145       | Ywhag                                                                                                                                                                                                         |
| Macropinocytosis Signaling                                      | 0.42                 | 0.0132       | Actn4                                                                                                                                                                                                         |
| Integrin Signaling                                              | 0.41                 | 0.0098       | Actn4, Actg1                                                                                                                                                                                                  |
| VDR/RXR Activation                                              | 0.38                 | 0.0123       | Psmc5                                                                                                                                                                                                         |
| Acute Myeloid Leukemia Signaling                                | 0.37                 | 0.0118       | Jup                                                                                                                                                                                                           |
| Actin Cytoskeleton Signaling                                    | 0.36                 | 0.0084       | Actn4, Actg1                                                                                                                                                                                                  |
| FAK Signaling                                                   | 0.33                 | 0.0096       | Actg1                                                                                                                                                                                                         |
| Neuregulin Signaling                                            | 0.33                 | 0.0095       | Rps6                                                                                                                                                                                                          |
| Crosstalk between Dendritic Cells and Natural Killer Cells      | 0.32                 | 0.0102       | Actg1                                                                                                                                                                                                         |
| IGF-1 Signaling                                                 | 0.32                 | 0.0100       | Ywhag                                                                                                                                                                                                         |
| RhoA Signaling                                                  | 0.28                 | 0.0091       | Actg1                                                                                                                                                                                                         |
| Regulation of eIF4 and p70S6K Signaling                         | 0.28                 | 0.0074       | Rps6                                                                                                                                                                                                          |
| Type I Diabetes Mellitus Signaling                              | 0.27                 | 0.0083       | Myo5b                                                                                                                                                                                                         |
| 14-3-3-mediated Signaling                                       | 0.25                 | 0.0081       | Ywhag                                                                                                                                                                                                         |
| Hereditary Breast Cancer Signaling                              | 0.25                 | 0.0076       | Xpc                                                                                                                                                                                                           |
| PI3K/AKT Signaling                                              | 0.24                 | 0.0070       | Ywhag                                                                                                                                                                                                         |
| Cardiac $\beta$ -adrenergic Signaling                           | 0.23                 | 0.0066       | Akap8                                                                                                                                                                                                         |

**Table S2: Ingenuity Pathway Analysis.**

Canonical Pathways represented by Rad23b interacting partners common to ES clones B11 and F11, as calculated by Ingenuity Pathway Analysis. Corresponds to Figure S1.

| Nr. | Gene Symbol    | Relation to proteasome | Reference                                                                                                                                                                                                                                |
|-----|----------------|------------------------|------------------------------------------------------------------------------------------------------------------------------------------------------------------------------------------------------------------------------------------|
| 1   | CltA           | Core interaction       | "The ubiquitin-proteasome system and endocytosis". Strous <i>et al</i> , J Cell Sci. 1999 May;112 ( Pt 10):1417-23. Review.                                                                                                              |
| 2   | Jup            | Target                 | "Differential interaction of plakoglobin and beta-catenin with the ubiquitin-proteasome system". Sadot <i>et al</i> , Oncogene. 2000 Apr 13;19(16):1992-2001.                                                                            |
| 3   | Spnb2          | Target                 | "Spectrin ubiquitination and oxidative stress: potential roles in blood and neurological disorders". Sangerman <i>et al</i> , Cell Mol Biol Lett. 2001;6(3):607-36. Review.                                                              |
| 4   | Fbxo34         | Core                   | "Systematic analysis and nomenclature of mammalian F-box proteins". Jin <i>et al</i> , Genes Dev. 2004 Nov 1;18(21):2573-80.                                                                                                             |
| 5   | Rp             | Core                   | "Ubiquitin and ubiquitin-like proteins in the nucleolus: multitasking tools for a ribosome factory". Shcherbik <i>et al</i> , Genes Cancer. 2010 Jul 1;1(7):681-689.                                                                     |
| 6   | Otud4          | Core                   | "Genome-wide loss-of-function analysis of deubiquitylating enzymes for zebrafish development". Tse <i>et al</i> , BMC Genomics. 2009 Dec 30;10:637.                                                                                      |
| 7   | Bag3           | Target                 | "Transcriptional upregulation of BAG3 upon proteasome inhibition". Wang <i>et al</i> , Biochem Biophys Res Commun. 2008 Jan 11;365(2):381-5.                                                                                             |
| 8   | Eif4a3         | Core                   | "A novel function of Drosophila eIF4A as a negative regulator of Dpp/BMP signalling that mediates SMAD degradation". Li <i>et al</i> , Nat Cell Biol. 2006 Dec;8(12):1407-14.                                                            |
| 9   | G3bp2          | Core                   | "Ras-GAP SH3 domain binding protein (G3BP) is a modulator of USP10, a novel human ubiquitin specific protease". Soncini <i>et al</i> , Oncogene. 2001 Jun 28;20(29):3869-79.                                                             |
| 10  | Ybx1           | Target                 | "RBBP6 interacts with multifunctional protein YB-1 through its RING finger domain, leading to ubiquitination and proteasomal degradation of YB-1". Chibi <i>et al</i> , J Mol Biol. 2008 Dec 26;384(4):908-16.                           |
| 11  | Fgfr, Fyn, Lyn | Target                 | "Cbl-mediated degradation of Lyn and Fyn induced by constitutive fibroblast growth factor receptor-2 activation supports osteoblast differentiation". Kaabeche <i>et al</i> , J Biol Chem. 2004 Aug 27;279(35):36259-67.                 |
| 12  | Rab and Gdi2   | Target                 | "The ubiquitin-proteasome system regulates membrane fusion of yeast vacuoles". Kleijnen <i>et al</i> , EMBO J. 2007 Jan 24;26(2):275-87.                                                                                                 |
| 13  | Rac1           | Target                 | "Proteasome-mediated degradation of Rac1-GTP during epithelial cell scattering". Lynch <i>et al</i> , Mol Biol Cell. 2006 May;17(5):2236-42.                                                                                             |
| 14  | G protein      | Target                 | "Gettin' down with ubiquitin: turning off cell-surface receptors, transporters and channels". Hicke L., Trends Cell Biol. 1999 Mar;9(3):107-12. Review.                                                                                  |
| 15  | Cdk and PcnA   | Core                   | "Interaction with cyclin-dependent kinases and PCNA modulates proteasome-dependent degradation of p21". Cayrol <i>et al</i> , Oncogene. 1998 Nov 12;17(19):2437-44.                                                                      |
| 16  | Hsp            | Core                   | "HSP27 and HSP70: potentially oncogenic apoptosis inhibitors". Garrido <i>et al</i> , Cell Cycle. 2003 Nov-Dec;2(6):579-84. Review.                                                                                                      |
| 17  | Nsf            | Core                   | "Golgi reassembly after mitosis: the AAA family meets the ubiquitin family". Meyer HH, Biochim Biophys Acta. 2005 Jul 10;1744(3):481-92. Review.                                                                                         |
| 18  | Trap1          | Core                   | "TRAP1 and the proteasome regulatory particle TBP7/Rpt3 interact in the endoplasmic reticulum and control cellular ubiquitination of specific mitochondrial proteins". Amoroso <i>et al</i> , Cell Death Differ. 2012 Apr;19(4):592-604. |
| 19  | Act            | Target                 | "Novel interactions between actin and the proteasome revealed by complex haploinsufficiency". Haarer <i>et al</i> , PLoS Genet. 2011 Sep;7(9):e1002288.                                                                                  |
| 20  | Arf            | Target                 | "The promiscuity of ARF interactions with the proteasome". Pollice <i>et al</i> , FEBS Lett. 2008 Oct 15;582(23-24):3257-62.                                                                                                             |
| 21  | Blk            | Target                 | "Regulation of the Src family tyrosine kinase Blk through E6AP-mediated ubiquitination". Oda <i>et al</i> , Proc Natl Acad Sci U S A. 1999 Aug 17;96(17):9557-62.                                                                        |
| 22  | Cct            | Target                 | "Proteasome-dependent degradation of cytosolic chaperonin CCT". Yokota <i>et al</i> , Biochem Biophys Res Commun. 2000 Dec 20;279(2):712-7.                                                                                              |
| 23  | Diablo         | Target                 | "Proteasome-mediated degradation of Smac during apoptosis: XIAP promotes Smac ubiquitination in vitro". MacFarlane <i>et al</i> , J Biol Chem. 2002 Sep 27;277(39):36611-6.                                                              |



|    |         |        |                                                                                                                                                                                                                                    |
|----|---------|--------|------------------------------------------------------------------------------------------------------------------------------------------------------------------------------------------------------------------------------------|
| 24 | Hck     | Target | "Membrane-anchored Cbl suppresses Hck protein-tyrosine kinase mediated cellular transformation". Howlett <i>et al</i> , <i>Oncogene</i> . 2002 Mar 7;21(11):1707-16.                                                               |
| 25 | Lck     | Target | "Regulation of the Src family kinase Lck by Hsp90 and ubiquitination". Giannini <i>et al</i> , <i>Mol Cell Biol</i> . 2004 Jul;24(13):5667-76.                                                                                     |
| 26 | Ran     | Core   | "The cyclophilin-like domain mediates the association of Ran-binding protein 2 with subunits of the 19 S regulatory complex of the proteasome". Ferreira <i>et al</i> , <i>J Biol Chem</i> . 1998 Sep 18;273(38):24676-82.         |
| 27 | Cdk9    | Target | "Interaction between cyclin T1 and SCF(SKP2) targets CDK9 for ubiquitination and degradation by the proteasome". Kiernan <i>et al</i> , <i>Mol Cell Biol</i> . 2001 Dec;21(23):7956-70.                                            |
| 28 | Cfl1    | Target | "Tyrosine phosphorylation of cofilin at Y68 by v-Src leads to its degradation through ubiquitin-proteasome pathway". Yoo <i>et al</i> , <i>Oncogene</i> . 2010 Jan 14;29(2):263-72.                                                |
| 29 | Hdac1   | Target | "Rapid induction of histone hyperacetylation and cellular differentiation in human breast tumor cell lines following degradation of histone deacetylase-1". Zhou <i>et al</i> , <i>J Biol Chem</i> . 2000 Nov 10;275(45):35256-63. |
| 30 | Hist    | Target | "Ubiquitin proteasome system (UPS): what can chromatin do for you?" O'Connell <i>et al</i> , <i>Curr Opin Cell Biol</i> . 2007 Apr;19(2):206-14. Epub 2007 Feb 20. Review.                                                         |
| 31 | Hnrnp   | Target | "hnRNP K: an HDM2 target and transcriptional coactivator of p53 in response to DNA damage". Moumen <i>et al</i> , <i>Cell</i> . 2005 Dec 16;123(6):1065-78.                                                                        |
| 32 | Mcm     | Target | "The ubiquitin-proteasome system is a key component of the SUMO-2/3 cycle". Schimmel <i>et al</i> , <i>Mol Cell Proteomics</i> . 2008 Nov;7(11):2107-22.                                                                           |
| 33 | Mybbp1a | Target | "Quantitative proteomics identifies the Myb-binding protein p160 as a novel target of the von Hippel-Lindau tumor suppressor". Lai <i>et al</i> , <i>PLoS One</i> . 2011 Feb 28;6(2):e16975.                                       |
| 34 | Npm1    | Target | "Recruitment of phosphorylated NPM1 to sites of DNA damage through RNF8-dependent ubiquitin conjugates". Koike <i>et al</i> , <i>Cancer Res</i> . 2010 Sep 1;70(17):6746-56.                                                       |
| 35 | Pcbp    | Target | "Activation of the HIF prolyl hydroxylase by the iron chaperones PCBP1 and PCBP2". Nandal <i>et al</i> , <i>Cell Metab</i> . 2011 Nov 2;14(5):647-57.                                                                              |
| 36 | Rpa     | Target | "Cell cycle- and proteasome-dependent formation of etoposide-induced replication protein A (RPA) or Mre11/Rad50/Nbs1 (MRN) complex repair foci". Robison <i>et al</i> , <i>Cell Cycle</i> . 2007 Oct 1;6(19):2399-407.             |
| 37 | Tardbp  | Target | "Degradation of TDP-43 and its pathogenic form by autophagy and the ubiquitin-proteasome system". Wang <i>et al</i> , <i>Neurosci Lett</i> . 2010 Jan 18;469(1):112-6.                                                             |
| 38 | Top     | Target | "26 S proteasome-mediated degradation of topoisomerase II cleavable complexes". Mao <i>et al</i> , <i>J Biol Chem</i> . 2001 Nov 2;276(44):40652-8.                                                                                |

### Table S3: Literature Support

Literature supporting relationships to the proteasome not found in Ingenuity Pathway Analysis or Ensembl GO term classification. Corresponds to Figures S1 and S2.

| Symbol  | Entrez Gene Name                                                                         | Score | GO biological process                                                                               |
|---------|------------------------------------------------------------------------------------------|-------|-----------------------------------------------------------------------------------------------------|
| Rpl24   | ribosomal protein L24                                                                    | 134   | GO:0000027 ribosomal large subunit assembly                                                         |
| Rps14   | ribosomal protein S14                                                                    | 279   | GO:0000028 ribosomal small subunit assembly                                                         |
| Rps6    | ribosomal protein S6                                                                     | 369   |                                                                                                     |
| Npm1    | nucleophosmin (nucleolar phosphoprotein B23, numatrin)                                   | 627   | GO:0000055 ribosomal large subunit export from nucleus                                              |
| Cdk6    | cyclin-dependent kinase 6                                                                | 46    | GO:0000080 G1 phase of mitotic cell cycle                                                           |
| Cdk4    | cyclin-dependent kinase 4                                                                | 46    | GO:0000082 G1/S transition of mitotic cell cycle                                                    |
| Cdk14   | cyclin-dependent kinase 14                                                               | 46    | GO:0000086 G2/M transition of mitotic cell cycle                                                    |
| Fgfr2   | fibroblast growth factor receptor 2                                                      | 46    |                                                                                                     |
| Fgfr3   | fibroblast growth factor receptor 3                                                      | 46    |                                                                                                     |
| Hdac1   | histone deacetylase 1                                                                    | 70    | GO:0000122 negative regulation of transcription from RNA polymerase II promoter                     |
| Pcna    | proliferating cell nuclear antigen                                                       | 125   |                                                                                                     |
| Phb     | prohibitin                                                                               | 88    |                                                                                                     |
| Xpo1    | exportin 1 (CRM1 homolog, yeast)                                                         | 41    |                                                                                                     |
| Eif4a3  | eukaryotic translation initiation factor 4A3                                             | 71    | GO:0000184 nuclear-transcribed mRNA catabolic process, nonsense-mediated decay                      |
| Tuba1b  | tubulin, alpha 1b                                                                        | 660   | GO:0000226 microtubule cytoskeleton organization                                                    |
| Ddx39b  | DEAD (Asp-Glu-Ala-Asp) box polypeptide 39B                                               | 64    | GO:0000245 spliceosome assembly                                                                     |
| Cdk13   | cyclin-dependent kinase 13                                                               | 46    |                                                                                                     |
| Hnrmpm  | heterogeneous nuclear ribonucleoprotein M                                                | 128   | GO:0000380 alternative nuclear mRNA splicing, via spliceosome                                       |
| Sfpq    | splicing factor proline/glutamine-rich                                                   | 65    |                                                                                                     |
| Ddx5    | DEAD (Asp-Glu-Ala-Asp) box polypeptide 5                                                 | 112   | GO:0000381 regulation of alternative nuclear mRNA splicing, via spliceosome                         |
| Srsf1   | serine/arginine-rich splicing factor 1                                                   | 62    | GO:0000395 nuclear mRNA 5'-splice site recognition                                                  |
|         |                                                                                          |       | GO:0000462 maturation of SSU-rRNA from tricistronic rRNA transcript (SSU-rRNA, 5.8S rRNA, LSU-rRNA) |
| Rps24   | ribosomal protein S24                                                                    | 109   |                                                                                                     |
| Psm12   | proteasome (prosome, macropain) 26S subunit, non-ATPase, 12                              | 50    | GO:0000502 proteasome complex                                                                       |
| Top2a   | topoisomerase (DNA) II alpha 170kDa                                                      | 1280  | GO:0000712 resolution of meiotic recombination intermediates                                        |
| Top2b   | topoisomerase (DNA) II beta 180kDa                                                       | 583   |                                                                                                     |
| Rad23b  | RAD23 homolog B (S. cerevisiae)                                                          | 827   | GO:0000715 nucleotide-excision repair, DNA damage recognition                                       |
| Hmgn1   | high mobility group nucleosomal binding domain 1                                         | 70    | GO:0000720 pyrimidine dimer repair by nucleotide-excision repair                                    |
| Hspa1a  | heat shock 70kDa protein 1A                                                              | 86    | GO:0000723 telomere maintenance                                                                     |
| H2afx   | H2A histone family, member X                                                             | 947   | GO:0000724 double-strand break repair via homologous recombination                                  |
| Rpa1    | replication protein A1, 70kDa                                                            | 309   |                                                                                                     |
| Hspa1l  | heat shock 70kDa protein 1-like                                                          | 86    |                                                                                                     |
| Hspa2   | heat shock 70kDa protein 2                                                               | 86    | GO:0000902 cell morphogenesis                                                                       |
| Hspa8   | heat shock 70kDa protein 8                                                               | 86    |                                                                                                     |
| Cfl1    | cofilin 1 (non-muscle)                                                                   | 92    |                                                                                                     |
| Rab35   | RAB35, member RAS oncogene family                                                        | 72    | GO:0000910 cytokinesis                                                                              |
| Gnas    | GNAS (guanine nucleotide binding protein, alpha stimulating) complex locus               | 44    | GO:0001501 skeletal system development                                                              |
| Zic1    | Zic family member 1                                                                      | 44    |                                                                                                     |
| Atp5b   | ATP synthase, H+ transporting, mitochondrial F1 complex, beta polypeptide                | 411   |                                                                                                     |
| Fgfr1   | fibroblast growth factor receptor 1                                                      | 46    | GO:0001525 angiogenesis                                                                             |
| Gna13   | guanine nucleotide binding protein (G protein), alpha 13                                 | 44    |                                                                                                     |
| Dhcr7   | 7-dehydrocholesterol reductase                                                           | 66    | GO:0001568 blood vessel development                                                                 |
| Gnat1   | guanine nucleotide binding protein (G protein), alpha transducing activity polypeptide 1 | 44    |                                                                                                     |
| Gnat2   | guanine nucleotide binding protein (G protein), alpha transducing activity polypeptide 2 | 44    | GO:0001580 detection of chemical stimulus involved in sensory perception of bitter taste            |
| Gnat3   | guanine nucleotide binding protein, alpha transducing 3                                  | 71    |                                                                                                     |
| Vdac3   | voltage-dependent anion channel 3                                                        | 46    | GO:0001662 behavioral fear response                                                                 |
| Hsp90b1 | heat shock protein 90kDa beta (Grp94), member 1                                          | 155   | GO:0001666 response to hypoxia                                                                      |
| Pkm2    | pyruvate kinase, muscle                                                                  | 752   |                                                                                                     |
| Gna12   | guanine nucleotide binding protein (G protein) alpha 12                                  | 44    | GO:0001701 in utero embryonic development                                                           |
| Tpm1    | tropomyosin 1 (alpha)                                                                    | 381   |                                                                                                     |
| Fgfr4   | fibroblast growth factor receptor 4                                                      | 46    | GO:0001759 organ induction                                                                          |
| Cdk5    | cyclin-dependent kinase 5                                                                | 46    | GO:0001764 neuron migration                                                                         |
| Fyn     | FYN oncogene related to SRC, FGR, YES                                                    | 46    |                                                                                                     |

|               |                                                                                                       |     |            |                                                       |
|---------------|-------------------------------------------------------------------------------------------------------|-----|------------|-------------------------------------------------------|
| Lyn           | v-src-1 Yamaguchi sarcoma viral related oncogene homolog                                              | 46  | GO:0001782 | B cell homeostasis                                    |
| Hmgcs2        | 3-hydroxy-3-methylglutaryl-CoA synthase 2 (mitochondrial)                                             | 95  | GO:0001822 | kidney development                                    |
| Hsp90ab1      | heat shock protein 90kDa alpha (cytosolic), class B member 1                                          | 738 | GO:0001890 | placenta development                                  |
| Gnb2l1        | guanine nucleotide binding protein (G protein), beta polypeptide 2-like 1                             | 861 | GO:0001934 | positive regulation of protein phosphorylation        |
| Atp5a1        | ATP synthase, H <sup>+</sup> transporting, mitochondrial F1 complex, alpha subunit 1, cardiac muscle  | 728 | GO:0001937 | negative regulation of endothelial cell proliferation |
| Hmgb2         | high mobility group box 2                                                                             | 321 | GO:0001938 | positive regulation of endothelial cell proliferation |
| Gnai2         | guanine nucleotide binding protein (G protein), alpha inhibiting activity polypeptide 2               | 44  | GO:0001973 | adenosine receptor signaling pathway                  |
| Gnal          | guanine nucleotide binding protein (G protein), alpha activating activity polypeptide, olfactory type | 44  | GO:0001975 | response to amphetamine                               |
| Rac1          | ras-related C3 botulinum toxin substrate 1 (rho family, small GTP binding protein Rac1)               | 68  | GO:0002093 | auditory receptor cell morphogenesis                  |
| Rab3a         | RAB3A, member RAS oncogene family                                                                     | 72  | GO:0003016 | respiratory system process                            |
| Ddx21         | DEAD (Asp-Glu-Ala-Asp) box polypeptide 21                                                             | 354 |            |                                                       |
| Ddx3x         | DEAD (Asp-Glu-Ala-Asp) box polypeptide 3, X-linked                                                    | 245 |            |                                                       |
| Ddx3y         | DEAD (Asp-Glu-Ala-Asp) box polypeptide 3, Y-linked                                                    | 245 | GO:0005634 | nucleus                                               |
| Hnrnp2        | heterogeneous nuclear ribonucleoprotein H2 (H')                                                       | 67  |            |                                                       |
| Pcbp3         | poly(rC) binding protein 3                                                                            | 196 |            |                                                       |
| Abce1         | ATP-binding cassette, sub-family E (OABP), member 1                                                   | 180 | GO:0005737 | cytoplasm                                             |
| Eef2          | eukaryotic translation elongation factor 2                                                            | 56  |            |                                                       |
| Gapdh         | glyceraldehyde-3-phosphate dehydrogenase                                                              | 434 | GO:0006006 | glucose metabolic process                             |
| 1700009N14Rik | RIKEN cDNA 1700009N14 gene                                                                            | 66  |            |                                                       |
| Gnai1         | guanine nucleotide binding protein (G protein), alpha inhibiting activity polypeptide 1               | 44  |            |                                                       |
| Gnai3         | guanine nucleotide binding protein (G protein), alpha inhibiting activity polypeptide 3               | 44  |            |                                                       |
| Gnao1         | guanine nucleotide binding protein (G protein), alpha activating activity polypeptide O               | 44  |            |                                                       |
| Rab10         | RAB10, member RAS oncogene family                                                                     | 72  |            |                                                       |
| Rab12         | RAB12, member RAS oncogene family                                                                     | 72  |            |                                                       |
| Rab14         | RAB14, member RAS oncogene family                                                                     | 72  |            |                                                       |
| Rab15         | RAB15, member RAS oncogene family                                                                     | 72  |            |                                                       |
| Rab1b         | RAB1B, member RAS oncogene family                                                                     | 72  |            |                                                       |
| Rab30         | RAB30, member RAS oncogene family                                                                     | 72  |            |                                                       |
| Rab33b        | RAB33B, member RAS oncogene family                                                                    | 87  |            |                                                       |
| Rab37         | RAB37, member RAS oncogene family                                                                     | 72  |            |                                                       |
| Rab3b         | RAB3B, member RAS oncogene family                                                                     | 72  | GO:0006184 | GTP catabolic process                                 |
| Rab3c         | RAB3C, member RAS oncogene family                                                                     | 72  |            |                                                       |
| Rab3d         | RAB3D, member RAS oncogene family                                                                     | 72  |            |                                                       |
| Rab43         | RAB43, member RAS oncogene family                                                                     | 72  |            |                                                       |
| Rab4a         | RAB4A, member RAS oncogene family                                                                     | 72  |            |                                                       |
| Rab4b         | RAB4B, member RAS oncogene family                                                                     | 72  |            |                                                       |
| Rab6b         | RAB6B, member RAS oncogene family                                                                     | 72  |            |                                                       |
| Rab8a         | RAB8A, member RAS oncogene family                                                                     | 72  |            |                                                       |
| Rab8b         | RAB8B, member RAS oncogene family                                                                     | 72  |            |                                                       |
| Rac2          | ras-related C3 botulinum toxin substrate 2 (rho family, small GTP binding protein Rac2)               | 68  |            |                                                       |
| Rac3          | ras-related C3 botulinum toxin substrate 3 (rho family, small GTP binding protein Rac3)               | 68  |            |                                                       |
| Ran           | RAN, member RAS oncogene family                                                                       | 167 |            |                                                       |
| Tuba4a        | tubulin, alpha 4a                                                                                     | 733 |            |                                                       |
| Mcm2          | minichromosome maintenance complex component 2                                                        | 49  |            |                                                       |
| Mcm4          | minichromosome maintenance complex component 4                                                        | 249 | GO:0006260 | DNA replication                                       |
| Mcm6          | minichromosome maintenance complex component 6                                                        | 524 |            |                                                       |
| Mcm7          | minichromosome maintenance complex component 7                                                        | 398 |            |                                                       |

|           |                                                                          |     |            |                                            |
|-----------|--------------------------------------------------------------------------|-----|------------|--------------------------------------------|
| Rpa3      | replication protein A3, 14kDa                                            | 50  |            |                                            |
| Ruvbl2    | RuvB-like 2 (E. coli)                                                    | 456 |            |                                            |
| Pura      | purine-rich element binding protein A                                    | 104 | GO:0006268 | DNA unwinding involved in replication      |
| Purb      | purine-rich element binding protein B                                    | 236 |            |                                            |
| Cdk2      | cyclin-dependent kinase 2                                                | 118 |            |                                            |
| Psmc1     | proteasome (prosome, macropain) 26S subunit, ATPase, 1                   | 234 |            |                                            |
| Psmc5     | proteasome (prosome, macropain) 26S subunit, ATPase, 5                   | 84  | GO:0006281 | DNA repair                                 |
| Psmc6     | proteasome (prosome, macropain) 26S subunit, ATPase, 6                   | 71  |            |                                            |
| Ruvbl1    | RuvB-like 1 (E. coli)                                                    | 88  |            |                                            |
| Cdk9      | cyclin-dependent kinase 9                                                | 46  | GO:0006282 | regulation of DNA repair                   |
| H2afy     | H2A histone family, member Y                                             | 314 |            |                                            |
| Hist1h1a  | histone cluster 1, H1a                                                   | 524 |            |                                            |
| Hist1h1b  | histone cluster 1, H1b                                                   | 722 |            |                                            |
| Hist1h1c  | histone cluster 1, H1c                                                   | 92  |            |                                            |
| Hist1h1d  | histone cluster 1, H1d                                                   | 793 | GO:0006334 | nucleosome assembly                        |
| Hist1h1e  | histone cluster 1, H1e                                                   | 687 |            |                                            |
| Hist1h2bb | histone cluster 1, H2bb                                                  | 918 |            |                                            |
| Hist1h2bl | histone cluster 1, H2bl                                                  | 752 |            |                                            |
| Hist2h2ac | histone cluster 2, H2ac                                                  | 229 |            |                                            |
| Mybbp1a   | MYB binding protein (P160) 1a                                            | 305 | GO:0006351 | transcription, DNA-dependent               |
| Gtf2ird1  | GTF2I repeat domain containing 1                                         | 59  |            |                                            |
| Hmbox1    | homeobox containing 1                                                    | 149 | GO:0006355 | regulation of transcription, DNA-dependent |
| Nrbf2     | nuclear receptor binding factor 2                                        | 76  |            |                                            |
| Tardbp    | TAR DNA binding protein                                                  | 146 |            |                                            |
| Fbl       | fibrillarlin                                                             | 218 |            |                                            |
| Rpl5      | ribosomal protein L5                                                     | 239 | GO:0006364 | rRNA processing                            |
| Rps16     | ribosomal protein S16                                                    | 332 |            |                                            |
| Rps7      | ribosomal protein S7                                                     | 207 |            |                                            |
| Cdk12     | cyclin-dependent kinase 12                                               | 46  |            |                                            |
| Hnrnpa2b1 | heterogeneous nuclear ribonucleoprotein A2/B1                            | 93  |            |                                            |
| Hnrnpa3   | heterogeneous nuclear ribonucleoprotein A3                               | 135 |            |                                            |
| Hnrnpc    | heterogeneous nuclear ribonucleoprotein C (C1/C2)                        | 98  |            |                                            |
| Hnrmpf    | heterogeneous nuclear ribonucleoprotein F                                | 51  | GO:0006397 | mRNA processing                            |
| Hnrmp1    | heterogeneous nuclear ribonucleoprotein H1 (H)                           | 67  |            |                                            |
| Hnrmpu    | heterogeneous nuclear ribonucleoprotein U (scaffold attachment factor A) | 182 |            |                                            |
| Pcbp1     | poly(rC) binding protein 1                                               | 252 |            |                                            |
| Ptbp1     | polypyrimidine tract binding protein 1                                   | 101 |            |                                            |
| Rpl10     | ribosomal protein L10                                                    | 341 |            |                                            |
| Rpl10a    | ribosomal protein L10A                                                   | 195 |            |                                            |
| Rpl10l    | ribosomal protein L10-like                                               | 221 |            |                                            |
| Rpl11     | ribosomal protein L11                                                    | 182 |            |                                            |
| Rpl12     | ribosomal protein L12                                                    | 84  |            |                                            |
| Rpl13a    | ribosomal protein L13a                                                   | 328 |            |                                            |
| Rpl15     | ribosomal protein L15                                                    | 207 |            |                                            |
| Rpl17     | ribosomal protein L17                                                    | 271 |            |                                            |
| Rpl18     | ribosomal protein L18                                                    | 288 |            |                                            |
| Rpl18a    | ribosomal protein L18a                                                   | 385 |            |                                            |
| Rpl19     | ribosomal protein L19                                                    | 236 | GO:0006412 | translation                                |
| Rpl22     | ribosomal protein L22                                                    | 600 |            |                                            |
| Rpl23     | ribosomal protein L23                                                    | 295 |            |                                            |
| Rpl26     | ribosomal protein L26                                                    | 253 |            |                                            |
| Rpl27     | ribosomal protein L27                                                    | 141 |            |                                            |
| Rpl27a    | ribosomal protein L27a                                                   | 131 |            |                                            |
| Rpl28     | ribosomal protein L28                                                    | 201 |            |                                            |
| Rpl29     | ribosomal protein L29                                                    | 123 |            |                                            |
| Rpl3      | ribosomal protein L3                                                     | 575 |            |                                            |
| Rpl30     | ribosomal protein L30                                                    | 122 |            |                                            |
| Rpl31     | ribosomal protein L31                                                    | 95  |            |                                            |
| Rpl32     | ribosomal protein L32                                                    | 121 |            |                                            |

|          |                                                                                                                                         |     |                                                          |
|----------|-----------------------------------------------------------------------------------------------------------------------------------------|-----|----------------------------------------------------------|
| Rpl34    | ribosomal protein L34                                                                                                                   | 184 |                                                          |
| Rpl35a   | ribosomal protein L35a                                                                                                                  | 121 |                                                          |
| Rpl36    | ribosomal protein L36                                                                                                                   | 43  |                                                          |
| Rpl36a   | ribosomal protein L36a                                                                                                                  | 61  |                                                          |
| Rpl37a   | ribosomal protein L37a                                                                                                                  | 40  |                                                          |
| Rpl4     | ribosomal protein L4                                                                                                                    | 698 |                                                          |
| Rpl6     | ribosomal protein L6                                                                                                                    | 244 |                                                          |
| Rpl7     | ribosomal protein L7                                                                                                                    | 377 |                                                          |
| Rpl9     | ribosomal protein L9                                                                                                                    | 94  |                                                          |
| Rps11    | ribosomal protein S11                                                                                                                   | 357 |                                                          |
| Rps13    | ribosomal protein S13                                                                                                                   | 89  |                                                          |
| Rps15a   | ribosomal protein S15a                                                                                                                  | 171 |                                                          |
| Rps2     | ribosomal protein S2                                                                                                                    | 380 |                                                          |
| Rps20    | ribosomal protein S20                                                                                                                   | 125 |                                                          |
| Rps23    | ribosomal protein S23                                                                                                                   | 151 |                                                          |
| Rps26    | ribosomal protein S26                                                                                                                   | 79  |                                                          |
| Rps27    | ribosomal protein S27                                                                                                                   | 224 |                                                          |
| Rps3     | ribosomal protein S3                                                                                                                    | 719 |                                                          |
| Rps3a    | ribosomal protein S3A                                                                                                                   | 378 |                                                          |
| Rps4x    | ribosomal protein S4, X-linked                                                                                                          | 559 |                                                          |
| Rps8     | ribosomal protein S8                                                                                                                    | 470 |                                                          |
| Rps9     | ribosomal protein S9                                                                                                                    | 628 |                                                          |
| Rplp0    | ribosomal protein, large, P0                                                                                                            | 112 | GO:0006414 translational elongation                      |
| Vars     | valyl-tRNA synthetase                                                                                                                   | 62  | GO:0006418 tRNA aminoacylation for protein translation   |
| Cct3     | chaperonin containing TCP1, subunit 3 (gamma)                                                                                           | 48  |                                                          |
| Cct4     | chaperonin containing TCP1, subunit 4 (delta)                                                                                           | 90  |                                                          |
| Cct6a    | chaperonin containing TCP1, subunit 6A (zeta 1)                                                                                         | 45  | GO:0006457 protein folding                               |
| Cct6b    | chaperonin containing TCP1, subunit 6B (zeta 2)                                                                                         | 45  |                                                          |
| Hsp90aa1 | heat shock protein 90kDa alpha (cytosolic), class A member 1                                                                            | 111 |                                                          |
| Trap1    | TNF receptor-associated protein 1                                                                                                       | 127 |                                                          |
| Cdk1     | cyclin-dependent kinase 1                                                                                                               | 118 | GO:0006461 protein complex assembly                      |
| Blk      | B lymphoid tyrosine kinase                                                                                                              | 46  |                                                          |
| Cdk15    | cyclin-dependent kinase 15                                                                                                              | 46  |                                                          |
| Cdk16    | cyclin-dependent kinase 16                                                                                                              | 43  |                                                          |
| Cdk17    | cyclin-dependent kinase 17                                                                                                              | 46  |                                                          |
| Cdk18    | cyclin-dependent kinase 18                                                                                                              | 46  |                                                          |
| Cdk20    | cyclin-dependent kinase 20                                                                                                              | 46  |                                                          |
| Fgr      | Gardner-Rasheed feline sarcoma viral (v-fgr) oncogene homolog                                                                           | 46  | GO:0006468 protein phosphorylation                       |
| Hck      | hemopoietic cell kinase                                                                                                                 | 46  |                                                          |
| Ick      | intestinal cell (MAK-like) kinase                                                                                                       | 46  |                                                          |
| Lck      | lymphocyte-specific protein tyrosine kinase                                                                                             | 46  |                                                          |
| Mak      | male germ cell-associated kinase                                                                                                        | 46  |                                                          |
| Yes1     | v-yes-1 Yamaguchi sarcoma viral oncogene homolog 1                                                                                      | 46  |                                                          |
| Uqcrc2   | ubiquinol-cytochrome c reductase core protein II                                                                                        | 282 | GO:0006508 proteolysis                                   |
| Psmc2    | proteasome (prosome, macropain) 26S subunit, ATPase, 2                                                                                  | 146 | GO:0006511 ubiquitin-dependent protein catabolic process |
| Glud1    | glutamate dehydrogenase 1                                                                                                               | 43  | GO:0006520 cellular amino acid metabolic process         |
| Shmt2    | serine hydroxymethyltransferase 2 (mitochondrial)                                                                                       | 85  | GO:0006544 glycine metabolic process                     |
| Mthfd1   | methylenetetrahydrofolate dehydrogenase (NADP+ dependent) 1, methenyltetrahydrofolate cyclohydrolase, formyltetrahydrofolate synthetase | 96  | GO:0006548 histidine catabolic process                   |
| Nop58    | NOP58 ribonucleoprotein homolog (yeast)                                                                                                 | 51  | GO:0006608 snRNP protein import into nucleus             |
| Tecr     | trans-2,3-enoyl-CoA reductase                                                                                                           | 58  | GO:0006629 lipid metabolic process                       |
| Fdps     | farnesyl diphosphate synthase                                                                                                           | 91  | GO:0006695 cholesterol biosynthetic process              |
| Coq6     | coenzyme Q6 homolog, monooxygenase (S. cerevisiae)                                                                                      | 59  | GO:0006744 ubiquinone biosynthetic process               |
| Slc25a3  | solute carrier family 25 (mitochondrial carrier; phosphate carrier), member 3                                                           | 78  | GO:0006810 transport                                     |

|          |                                                                                                     |     |            |                                                                          |
|----------|-----------------------------------------------------------------------------------------------------|-----|------------|--------------------------------------------------------------------------|
| Atp5c1   | ATP synthase, H <sup>+</sup> transporting, mitochondrial F1 complex, gamma polypeptide 1            | 264 | GO:0006811 | ion transport                                                            |
| Nsf      | N-ethylmaleimide-sensitive factor                                                                   | 173 | GO:0006813 | potassium ion transport                                                  |
| Vdac2    | voltage-dependent anion channel 2                                                                   | 92  | GO:0006820 | anion transport                                                          |
| Arf1     | ADP-ribosylation factor 1                                                                           | 111 | GO:0006878 | cellular copper ion homeostasis                                          |
| Arf2     | ADP-ribosylation factor 2                                                                           | 111 |            |                                                                          |
| Arf3     | ADP-ribosylation factor 3                                                                           | 111 | GO:0006886 | intracellular protein transport                                          |
| Cse1l    | CSE1 chromosome segregation 1-like (yeast)                                                          | 71  |            |                                                                          |
| Actc1    | actin, alpha, cardiac muscle 1                                                                      | 505 | GO:0006915 | apoptotic process                                                        |
| Diablo   | diablo, IAP-binding mitochondrial protein                                                           | 107 | GO:0006917 | induction of apoptosis                                                   |
| Serpinh1 | serpin peptidase inhibitor, clade H (heat shock protein 47), member 1, (collagen binding protein 1) | 51  | GO:0006950 | response to stress                                                       |
| Surf4    | surfeit 4                                                                                           | 44  | GO:0007030 | Golgi organization                                                       |
| Fermt3   | fermitin family member 3                                                                            | 477 | GO:0007155 | cell adhesion                                                            |
| Gdi2     | GDP dissociation inhibitor 2                                                                        | 228 |            |                                                                          |
| Rab26    | RAB26, member RAS oncogene family                                                                   | 72  | GO:0007264 | small GTPase mediated signal transduction                                |
| Actb     | actin, beta                                                                                         | 508 | GO:0007409 | axonogenesis                                                             |
| Actbl2   | actin, beta-like 2                                                                                  | 294 |            |                                                                          |
| Rprd1b   | regulation of nuclear pre-mRNA domain containing 1B                                                 | 456 | GO:0008150 | biological_process                                                       |
| Ssr4     | signal sequence receptor, delta                                                                     | 53  |            |                                                                          |
| Dhps     | deoxyhypusine synthase                                                                              | 335 | GO:0008612 | peptidyl-lysine modification to hypusine                                 |
| Acta1    | actin, alpha 1, skeletal muscle                                                                     | 803 | GO:0009612 | response to mechanical stimulus                                          |
| Pcbp2    | poly(rC) binding protein 2                                                                          | 196 | GO:0009615 | response to virus                                                        |
| Rpa2     | replication protein A2, 32kDa                                                                       | 251 | GO:0010569 | regulation of double-strand break repair via homologous recombination    |
| Ube2v2   | ubiquitin-conjugating enzyme E2 variant 2                                                           | 65  | GO:0010976 | positive regulation of neuron projection development                     |
| Slc16a1  | solute carrier family 16, member 1 (monocarboxylic acid transporter 1)                              | 96  | GO:0015711 | organic anion transport                                                  |
| Slc25a4  | solute carrier family 25 (mitochondrial carrier; adenine nucleotide translocator), member 4         | 399 | GO:0015866 | ADP transport                                                            |
| Lyz1     | lysozyme 2                                                                                          | 110 | GO:0016998 | cell wall macromolecule catabolic process                                |
| Eif4a1   | eukaryotic translation initiation factor 4A1                                                        | 454 | GO:0031100 | organ regeneration                                                       |
| Phb2     | prohibitin 2                                                                                        | 242 | GO:0033147 | negative regulation of intracellular estrogen receptor signaling pathway |
| Dhx9     | DEAH (Asp-Glu-Ala-His) box polypeptide 9                                                            | 67  | GO:0034605 | cellular response to heat                                                |
| Syne1    | spectrin repeat containing, nuclear envelope 1                                                      | 46  | GO:0040023 | establishment of nucleus localization                                    |
| Psm1     | proteasome (prosome, macropain) 26S subunit, non-ATPase, 1                                          | 189 |            |                                                                          |
| Psm2     | proteasome (prosome, macropain) 26S subunit, non-ATPase, 2                                          | 171 | GO:0042176 | regulation of protein catabolic process                                  |
| Psm3     | proteasome (prosome, macropain) 26S subunit, non-ATPase, 3                                          | 80  |            |                                                                          |
| Rpl7a    | ribosomal protein L7a                                                                               | 572 | GO:0042254 | ribosome biogenesis                                                      |
| Actg1    | actin, gamma 1                                                                                      | 508 | GO:0045214 | sarcomere organization                                                   |
| Dut      | deoxyuridine triphosphatase                                                                         | 51  | GO:0046080 | dUTP metabolic process                                                   |
| Lbr      | lamin B receptor                                                                                    | 144 | GO:0055114 | oxidation-reduction process                                              |

**Table S4: GO Term Classification**

GO Term search ([www.ensembl.org/biomart](http://www.ensembl.org/biomart)) of Rad23b interacting proteins in erythroid (I/11, fetal liver E13.5dpc) cells. Corresponds to Figure S2.

| Ingenuity Canonical Pathways                                    | <b>-log(p-value)</b> | <b>Ratio</b> | <b>Molecules</b>                                                                                                                                                                                                                                                                                                   |
|-----------------------------------------------------------------|----------------------|--------------|--------------------------------------------------------------------------------------------------------------------------------------------------------------------------------------------------------------------------------------------------------------------------------------------------------------------|
| EIF2 Signaling                                                  | 43.10                | 0.23         | RPL24,RPL11,RPL22,RPL27A,RPL31,RPS8,RPS6,RPL26,RPS23,RPL37A,RPS11,RPL7,RPS7,RPS27,RPL6,RPS3A,RPL36A/RPL36AP8,RPL18A,RPS9,RPS16,RPL19,RPS3,RPL18,RPL4,RPL7A,RPL3,RPL34,RPL17,RPS2,RPL27,RPL12,RPL30,RPL23,RPLP0,RPL15,RPS4X,RPL5,RPL10 (includes others),RPS26,RPL28,RPL35A,EIF4A3,EIF4A1,RPL32,RPS15A,RPL13A,RPS14 |
| Cell Cycle Control of Chromosomal Replication                   | 13.00                | 0.36         | MCM6,RPA3,MCM2,CDK5,CDK4,CDK6,RPA1,MCM4,CDK2,MCM7,RPA2                                                                                                                                                                                                                                                             |
| Regulation of eIF4 and p70S6K Signaling                         | 9.83                 | 0.10         | RPS2,RPS6,RPS8,RPS23,RPS11,RPS7,RPS4X,RPS27,RPS3A,RPS26,EIF4A3,RPS16,EIF4A1,RPS9,RPS15A,RPS3,RPS14                                                                                                                                                                                                                 |
| mTOR Signaling                                                  | 9.01                 | 0.09         | RPS2,RAC1,RPS6,RPS8,RPS23,RPS11,RPS7,RPS27,RPS4X,RPS3A,RPS26,EIF4A3,RPS16,RPS9,EIF4A1,RPS15A,RPS3,RPS14                                                                                                                                                                                                            |
| RhoGDI Signaling                                                | 8.78                 | 0.09         | CFL1,ACTB,GNA12,GNB2L1,GDI2,GNAI1,RAC1,ACTG1,GNAI2,GNAI3,GNAT1,GNAT2,GNAO1,GNA13,ACTC1,ACTA1,GNAL                                                                                                                                                                                                                  |
| Fcy Receptor-mediated Phagocytosis in Macrophages and Monocytes | 7.71                 | 0.12         | FYN,RAC2,YES1,ACTB,HCK,RAC1,LYN,ACTC1,RAC3,ACTG1,FGR,ACTA1                                                                                                                                                                                                                                                         |
| Ephrin Receptor Signaling                                       | 7.14                 | 0.08         | FYN,RAC2,CFL1,GNA12,GNB2L1,GNAI1,RAC1,RAC3,GNAI2,GNAI3,GNAT1,GNAT2,GNAO1,GNA13,GNAL                                                                                                                                                                                                                                |
| Inositol Phosphate Metabolism                                   | 7.03                 | 0.07         | GNAT3,CDK18,GNAI1,CDK6,CDK1,GNAI2,GNAI3,GNAT1,CDK5,GNAT2,CDK4,GNAO1,MAK,CDK2                                                                                                                                                                                                                                       |
| Granzyme A Signaling                                            | 6.53                 | 0.30         | HIST1H1C,HIST1H1E,HIST1H1A,HIST1H1D,HIST1H1B,HMGB2                                                                                                                                                                                                                                                                 |
| Role of NFAT in Regulation of the Immune Response               | 6.36                 | 0.07         | FYN,GNA12,GNB2L1,GNAI1,GNAI2,GNAI3,LCK,GNAT1,GNAT2,GNAO1,LYN,XPO1,GNA13,GNAL                                                                                                                                                                                                                                       |
| Signaling by Rho Family GTPases                                 | 6.23                 | 0.06         | CFL1,ACTB,GNA12,GNB2L1,GNAI1,RAC1,ACTG1,GNAI2,GNAI3,GNAT1,GNAT2,GNAO1,GNA13,ACTC1,ACTA1,GNAL                                                                                                                                                                                                                       |
| Role of Tissue Factor in Cancer                                 | 6.01                 | 0.10         | BLK,FYN,LCK,YES1,CFL1,GNA12,HCK,RAC1,LYN,GNA13,FGR                                                                                                                                                                                                                                                                 |
| G Beta Gamma Signaling                                          | 5.99                 | 0.09         | GNAI2,GNAI3,GNAT1,GNAT2,GNA12,GNAO1,GNB2L1,GNAI1,GNA13,GNAL                                                                                                                                                                                                                                                        |
| Androgen Signaling                                              | 5.93                 | 0.08         | GNAI2,GNAI3,GNAT1,GNAT2,GNA12,GNAO1,GNB2L1,GNAI1,GNA13,GNAL                                                                                                                                                                                                                                                        |
| IL-1 Signaling                                                  | 5.86                 | 0.09         | GNAI2,GNAI3,GNAT1,GNAT2,GNA12,GNAO1,GNB2L1,GNAI1,GNA13,GNAL                                                                                                                                                                                                                                                        |
| Protein Ubiquitination Pathway                                  | 5.61                 | 0.06         | HSPA1A/HSPA1B,UBE2V2,PSMD3,HSPA2,PSMC5,HSPA8,HSP90B1,PSMC1,HSP90AB1,HSPA1L,PSMC6,PSMD2,PSMD12,HSP90AA1,PSMD1,PSMC2                                                                                                                                                                                                 |
| CXCR4 Signaling                                                 | 5.37                 | 0.07         | GNAI2,GNAI3,GNAT1,GNAT2,GNA12,GNAO1,GNB2L1,GNAI1,RAC1,LYN,GNA13,GNAL                                                                                                                                                                                                                                               |
| Axonal Guidance Signaling                                       | 4.98                 | 0.04         | FYN,RAC2,CFL1,GNA12,GNB2L1,GNAI1,RAC1,TUBA4A,TUBB,TUBA1B,RAC3,GNAI2,GNAI3,GNAT1,CDK5,GNAT2,GNAO1,GNA13,GNAL                                                                                                                                                                                                        |
| Molecular Mechanisms of Cancer                                  | 4.66                 | 0.05         | FYN,RAC2,GNA12,GNAI1,RAC1,CDK6,RAC3,GNAI2,GNAI3,GNAT1,GNAT2,CDK4,GNAO1,GNA13,DIABLO,GNAL,CDK2                                                                                                                                                                                                                      |
| Synaptic Long Term Depression                                   | 4.58                 | 0.07         | GNAI2,GNAI3,GNAT1,GNAT2,GNA12,GNAO1,GNAI1,LYN,GNA13,GNAL                                                                                                                                                                                                                                                           |
| Reelin Signaling in Neurons                                     | 4.53                 | 0.10         | BLK,FYN,LCK,YES1,CDK5,HCK,LYN,FGR                                                                                                                                                                                                                                                                                  |
| Germ Cell-Sertoli Cell Junction Signaling                       | 4.51                 | 0.07         | RAC2,ACTB,RAC1,TUBA4A,TUBB,ACTC1,RAC3,ACTG1,TUBA1B,RAB8B,ACTA1                                                                                                                                                                                                                                                     |
| Relaxin Signaling                                               | 4.38                 | 0.06         | GNAI2,GNAI3,GNAT1,GNAT2,GNA12,GNAO1,GNB2L1,GNAI1,GNA13,GNAL                                                                                                                                                                                                                                                        |
| Gap Junction Signaling                                          | 4.38                 | 0.06         | GNAI2,GNAI3,ACTB,GNAI1,TUBA4A,TUBB,ACTC1,ACTG1,TUBA1B,ACTA1,GNAL                                                                                                                                                                                                                                                   |
| Breast Cancer Regulation by Stathmin1                           | 4.35                 | 0.06         | GNAI2,GNAI3,GNB2L1,GNAI1,RAC1,TUBA4A,GNA13,TUBB,TUBA1B,CDK1,GNAL,CDK2                                                                                                                                                                                                                                              |
| Virus Entry via Endocytic Pathways                              | 4.12                 | 0.08         | FYN,RAC2,ACTB,RAC1,ACTC1,RAC3,ACTG1,ACTA1                                                                                                                                                                                                                                                                          |
| Agrin Interactions at Neuromuscular Junction                    | 4.07                 | 0.10         | RAC2,ACTB,RAC1,ACTC1,RAC3,ACTG1,ACTA1                                                                                                                                                                                                                                                                              |
| Integrin Signaling                                              | 3.56                 | 0.05         | FYN,RAC2,ARF1,ARF3,ACTB,RAC1,Arf2,ACTC1,RAC3,ACTG1,ACTA1                                                                                                                                                                                                                                                           |
| Regulation of Actin-based Motility by Rho                       | 3.50                 | 0.08         | RAC2,CFL1,ACTB,RAC1,ACTC1,RAC3,ACTA1                                                                                                                                                                                                                                                                               |
| Cell Cycle: G1/S Checkpoint Regulation                          | 3.49                 | 0.09         | RPL11,RPL5,CDK4,HDAC1,CDK6,CDK2                                                                                                                                                                                                                                                                                    |
| CREB Signaling in Neurons                                       | 3.48                 | 0.05         | GNAI2,GNAI3,GNAT1,GNAT2,GNA12,GNAO1,GNB2L1,GNAI1,GNA13,GNAL                                                                                                                                                                                                                                                        |
| Mechanisms of Viral Exit from Host Cells                        | 3.44                 | 0.11         | ACTB,XPO1,ACTC1,ACTG1,ACTA1                                                                                                                                                                                                                                                                                        |
| Thrombin Signaling                                              | 3.12                 | 0.05         | GNAI2,GNAI3,GNAT1,GNAT2,GNA12,GNAO1,GNB2L1,GNAI1,GNA13,GNAL                                                                                                                                                                                                                                                        |
| Nicotinate and Nicotinamide Metabolism                          | 3.06                 | 0.05         | CDK18,CDK5,CDK4,CDK6,MAK,CDK1,CDK2                                                                                                                                                                                                                                                                                 |
| Purine Metabolism                                               | 3.04                 | 0.03         | PKM2,NSF,ATP5C1,PSMC1,ATP5B,PSMC6,ATP5A1,HSP90AA1,PSMC2,ACTC1,PSMC5,GNAL                                                                                                                                                                                                                                           |
| eNOS Signaling                                                  | 3.03                 | 0.05         | HSPA8,HSP90B1,HSPA1L,HSP90AB1,HSPA1A/HSPA1B,HSP90AA1,HSPA2,GNAL                                                                                                                                                                                                                                                    |
| Endothelin-1 Signaling                                          | 2.97                 | 0.05         | GNAI2,GNAI3,GNAT1,GNAT2,GNA12,GNAO1,GNAI1,GNA13,GNAL                                                                                                                                                                                                                                                               |
| Protein Kinase A Signaling                                      | 2.96                 | 0.04         | HIST3H3,HIST1H1C,HIST1H1E,GNB2L1,HIST1H1A,GNAI1,H3F3C,GNAI2,GNAI3,HIST1H1D,GNA13,HIST1H1B,GNAL                                                                                                                                                                                                                     |
| PTEN Signaling                                                  | 2.84                 | 0.06         | FGFR3,RAC2,FGFR4,FGFR1,RAC1,FGFR2,RAC3                                                                                                                                                                                                                                                                             |
| IL-8 Signaling                                                  | 2.82                 | 0.05         | GNAI2,GNAI3,RAC2,GNA12,GNB2L1,GNAI1,RAC1,GNA13,RAC3                                                                                                                                                                                                                                                                |
| Role of CHK Proteins in Cell Cycle Checkpoint Control           | 2.79                 | 0.11         | PCNA,RPA1,CDK1,CDK2                                                                                                                                                                                                                                                                                                |

|                                                            |      |      |                                                                 |
|------------------------------------------------------------|------|------|-----------------------------------------------------------------|
| RhoA Signaling                                             | 2.77 | 0.06 | CFL1,GNA12,ACTB,GNA13,ACTC1,ACTG1,ACTA1                         |
| RAN Signaling                                              | 2.75 | 0.13 | CSE1L,RAN,XPO1                                                  |
| Sphingosine-1-phosphate Signaling                          | 2.75 | 0.06 | GNAI2,GNAI3,GNA12,GNAI1,RAC1,GNA13,GNAL                         |
| Sertoli Cell-Sertoli Cell Junction Signaling               | 2.74 | 0.05 | ACTB,RAC1,TUBA4A,TUBB,ACTC1,ACTG1,TUBA1B,RAB8B,ACTA1            |
| Actin Cytoskeleton Signaling                               | 2.70 | 0.04 | RAC2,CFL1,GNA12,ACTB,RAC1,GNA13,ACTC1,RAC3,ACTG1,ACTA1          |
| Nucleotide Excision Repair Pathway                         | 2.70 | 0.11 | RPA3,RPA1,RAD23B,RPA2                                           |
| Hereditary Breast Cancer Signaling                         | 2.69 | 0.06 | NPM1,H2AFX,CDK4,HDAC1,CDK6,RPA1,CDK1                            |
| FAK Signaling                                              | 2.64 | 0.06 | FYN,ACTB,RAC1,ACTC1,ACTG1,ACTA1                                 |
| Cardiac Hypertrophy Signaling                              | 2.61 | 0.04 | GNAI2,GNAI3,GNAT1,GNAT2,GNA12,GNAO1,GNB2L1,GNAI1,GNA13,GNAL     |
| Leukocyte Extravasation Signaling                          | 2.55 | 0.05 | GNAI2,GNAI3,RAC2,ACTB,GNAI1,RAC1,ACTC1,ACTG1,ACTA1              |
| SAPK/JNK Signaling                                         | 2.47 | 0.06 | RAC2,LCK,GNA12,RAC1,GNA13,RAC3                                  |
| Paxillin Signaling                                         | 2.32 | 0.05 | ARF1,ACTB,RAC1,ACTC1,ACTG1,ACTA1                                |
| Aryl Hydrocarbon Receptor Signaling                        | 2.26 | 0.04 | HSP90B1,HSP90AB1,CDK4,CDK6,HSP90AA1,CDK2,MCM7                   |
| MSP-RON Signaling Pathway                                  | 2.26 | 0.08 | ACTB,ACTC1,ACTG1,ACTA1                                          |
| Caveolar-mediated Endocytosis Signaling                    | 2.24 | 0.06 | FYN,ACTB,ACTC1,ACTG1,ACTA1                                      |
| Huntington's Disease Signaling                             | 2.18 | 0.04 | HSPA8,NSF,ATP5B,HSPA1L,CDK5,HSPA1A/HSPA1B,GNB2L1,HDAC1,HSPA2    |
| Cyclins and Cell Cycle Regulation                          | 2.14 | 0.06 | CDK4,HDAC1,CDK6,CDK1,CDK2                                       |
| Clathrin-mediated Endocytosis Signaling                    | 2.10 | 0.04 | HSPA8,RAB4A,ACTB,RAC1,ACTC1,ACTG1,ACTA1,RAB4B                   |
| Semaphorin Signaling in Neurons                            | 2.07 | 0.08 | FYN,CDK5,CFL1,RAC1                                              |
| CCR3 Signaling in Eosinophils                              | 2.07 | 0.05 | GNAI2,GNAI3,CFL1,GNB2L1,GNAI1,RAC1                              |
| FGF Signaling                                              | 2.01 | 0.06 | FGFR3,FGFR4,FGFR1,RAC1,FGFR2                                    |
| Aldosterone Signaling in Epithelial Cells                  | 1.97 | 0.04 | HSPA8,HSP90B1,HSPA1L,HSP90AB1,HSPA1A/HSPA1B,HSP90AA1,HSPA2      |
| $\alpha$ -Adrenergic Signaling                             | 1.95 | 0.05 | GNAI2,GNAI3,GNB2L1,GNAI1,GNAL                                   |
| Neuregulin Signaling                                       | 1.93 | 0.05 | HSP90B1,CDK5,HSP90AB1,HSP90AA1,RPS6                             |
| p70S6K Signaling                                           | 1.91 | 0.05 | GNAI2,GNAI3,EEF2,GNAI1,LYN,RPS6                                 |
| Mitotic Roles of Polo-Like Kinase                          | 1.81 | 0.06 | HSP90B1,HSP90AB1,HSP90AA1,CDK1                                  |
| Hypoxia Signaling in the Cardiovascular System             | 1.76 | 0.06 | HSP90B1,HSP90AB1,HSP90AA1,UBE2V2                                |
| Natural Killer Cell Signaling                              | 1.68 | 0.05 | FYN,RAC2,LCK,RAC1,RAC3                                          |
| Fc Epsilon RI Signaling                                    | 1.66 | 0.05 | FYN,RAC2,RAC1,LYN,RAC3                                          |
| CCR5 Signaling in Macrophages                              | 1.66 | 0.04 | GNAI2,GNAI3,GNB2L1,GNAI1                                        |
| Chemokine Signaling                                        | 1.66 | 0.05 | GNAI2,GNAI3,CFL1,GNAI1                                          |
| Mismatch Repair in Eukaryotes                              | 1.61 | 0.08 | PCNA,RPA1                                                       |
| Melatonin Signaling                                        | 1.60 | 0.05 | GNAI2,GNAI3,GNAO1,GNAI1                                         |
| fMLP Signaling in Neutrophils                              | 1.58 | 0.04 | GNAI2,GNAI3,GNB2L1,GNAI1,RAC1                                   |
| Phospholipase C Signaling                                  | 1.56 | 0.03 | FYN,LCK,GNB2L1,HDAC1,RAC1,LYN,GNA13,GNAL                        |
| Corticotropin Releasing Hormone Signaling                  | 1.54 | 0.04 | GNAI2,GNAI3,GNAO1,GNAI1,GNAL                                    |
| Cell Cycle: G2/M DNA Damage Checkpoint Regulation          | 1.52 | 0.06 | TOP2B,TOP2A,CDK1                                                |
| PKC $\theta$ Signaling in T Lymphocytes                    | 1.48 | 0.04 | FYN,RAC2,LCK,RAC1,RAC3                                          |
| Tight Junction Signaling                                   | 1.47 | 0.04 | CDK4,ACTB,RAC1,ACTC1,ACTG1,ACTA1                                |
| Prostate Cancer Signaling                                  | 1.43 | 0.04 | HSP90B1,HSP90AB1,HSP90AA1,CDK2                                  |
| One Carbon Pool by Folate                                  | 1.42 | 0.06 | MTHFD1,SHMT2                                                    |
| P2Y Purigenic Receptor Signaling Pathway                   | 1.40 | 0.04 | GNAI2,GNAI3,GNB2L1,GNAI1,GNAL                                   |
| GNRH Signaling                                             | 1.36 | 0.03 | GNAI2,GNAI3,GNAI1,RAC1,GNAL                                     |
| Biosynthesis of Steroids                                   | 1.35 | 0.02 | FDPS,DHCR7                                                      |
| NF- $\kappa$ B Signaling                                   | 1.34 | 0.03 | FGFR3,LCK,FGFR4,FGFR1,HDAC1,FGFR2                               |
| VEGF Signaling                                             | 1.34 | 0.04 | ACTB,ACTC1,ACTG1,ACTA1                                          |
| Crosstalk between Dendritic Cells and Natural Killer Cells | 1.31 | 0.04 | ACTB,ACTC1,ACTG1,ACTA1                                          |
| Glucocorticoid Receptor Signaling                          | 1.30 | 0.03 | HSPA8,HSP90B1,HSPA1L,HSP90AB1,HSPA1A/HSPA1B,RAC1,HSP90AA1,HSPA2 |
| p53 Signaling                                              | 1.25 | 0.04 | PCNA,CDK4,HDAC1,CDK2                                            |
| ATM Signaling                                              | 1.24 | 0.05 | H2AFX,CDK1,CDK2                                                 |
| Cellular Effects of Sildenafil (Viagra)                    | 1.23 | 0.03 | ACTB,ACTC1,ACTG1,ACTA1,GNAL                                     |
| D-glutamine and D-glutamate Metabolism                     | 1.22 | 0.04 | GLUD1                                                           |



|                                                             |      |      |                                            |
|-------------------------------------------------------------|------|------|--------------------------------------------|
| Role of NFAT in Cardiac Hypertrophy                         | 1.19 | 0.03 | GNAI2,GNAI3,GNB2L1,HDAC1,GNAI1,GNAL        |
| Induction of Apoptosis by HIV1                              | 1.18 | 0.05 | SLC25A4,SLC25A3,DIABLO                     |
| ERK/MAPK Signaling                                          | 1.18 | 0.03 | HIST3H3,FYN,RAC2,RAC1,RAC3,H3F3C           |
| Telomerase Signaling                                        | 1.17 | 0.04 | HSP90B1,HSP90AB1,HDAC1,HSP90AA1            |
| GM-CSF Signaling                                            | 1.15 | 0.04 | GNB2L1,HCK,LYN                             |
| Role of PI3K/AKT Signaling in the Pathogenesis of Influenza | 1.10 | 0.04 | GNAI2,GNAI3,GNAI1                          |
| G Protein Signaling Mediated by Tubby                       | 1.04 | 0.05 | LCK,GNB2L1                                 |
| Small Cell Lung Cancer Signaling                            | 1.01 | 0.03 | CDK4,CDK6,CDK2                             |
| Cell Cycle Regulation by BTG Family Proteins                | 0.99 | 0.06 | CDK4,CDK2                                  |
| Dopamine-DARPP32 Feedback in cAMP Signaling                 | 0.95 | 0.03 | GNAI2,GNAI3,CDK5,GNAI1,GNAL                |
| Nitric Oxide Signaling in the Cardiovascular System         | 0.91 | 0.03 | HSP90B1,HSP90AB1,HSP90AA1                  |
| Estrogen Receptor Signaling                                 | 0.87 | 0.03 | HIST3H3,DDX5,PHB2,H3F3C                    |
| Human Embryonic Stem Cell Pluripotency                      | 0.86 | 0.03 | FGFR3,FGFR4,FGFR1,FGFR2                    |
| PI3K Signaling in B Lymphocytes                             | 0.84 | 0.03 | BLK,FYN,RAC1,LYN                           |
| Mitochondrial Dysfunction                                   | 0.82 | 0.02 | ATP5C1,ATP5B,ATP5A1,UQCRC2                 |
| Valine, Leucine and Isoleucine Biosynthesis                 | 0.80 | 0.02 | VAR5                                       |
| ILK Signaling                                               | 0.80 | 0.03 | CFL1,ACTB,ACTC1,ACTG1,ACTA1                |
| Synthesis and Degradation of Ketone Bodies                  | 0.77 | 0.05 | HMGCS2                                     |
| Chronic Myeloid Leukemia Signaling                          | 0.76 | 0.03 | CDK4,HDAC1,CDK6                            |
| Oxidative Phosphorylation                                   | 0.74 | 0.03 | ATP5C1,ATP5B,ATP5A1,UQCRC2                 |
| PPAR Signaling                                              | 0.74 | 0.03 | HSP90B1,HSP90AB1,HSP90AA1                  |
| T Cell Receptor Signaling                                   | 0.72 | 0.03 | FYN,LCK,RAC1                               |
| DNA Double-Strand Break Repair by Homologous Recombination  | 0.71 | 0.06 | RPA1                                       |
| Phototransduction Pathway                                   | 0.70 | 0.03 | GNAT1,GNAT2                                |
| Glioblastoma Multiforme Signaling                           | 0.69 | 0.02 | CDK4,RAC1,CDK6,CDK2                        |
| Telomere Extension by Telomerase                            | 0.68 | 0.06 | HNRNPA2B1                                  |
| Actin Nucleation by ARP-WASP Complex                        | 0.67 | 0.03 | GNA12,RAC1                                 |
| Pancreatic Adenocarcinoma Signaling                         | 0.65 | 0.03 | CDK4,RAC1,CDK2                             |
| Cyanoamino Acid Metabolism                                  | 0.63 | 0.02 | SHMT2                                      |
| Methane Metabolism                                          | 0.63 | 0.01 | SHMT2                                      |
| Folate Biosynthesis                                         | 0.63 | 0.01 | RUVBL2                                     |
| IL-15 Signaling                                             | 0.61 | 0.03 | LCK,RAC3                                   |
| Calcium-induced T Lymphocyte Apoptosis                      | 0.60 | 0.03 | LCK,HDAC1                                  |
| ERK5 Signaling                                              | 0.60 | 0.03 | GNA12,GNA13                                |
| Non-Small Cell Lung Cancer Signaling                        | 0.58 | 0.03 | CDK4,CDK6                                  |
| CD28 Signaling in T Helper Cells                            | 0.57 | 0.02 | FYN,LCK,RAC1                               |
| DNA Methylation and Transcriptional Repression Signaling    | 0.57 | 0.04 | HDAC1                                      |
| PPAR $\alpha$ /RXR $\alpha$ Activation                      | 0.57 | 0.02 | HSP90B1,HSP90AB1,HSP90AA1,GNAL             |
| RAR Activation                                              | 0.56 | 0.02 | RPL7A,RAC1,PSMC5,GNAL                      |
| 14-3-3-mediated Signaling                                   | 0.56 | 0.02 | TUBA4A,TUBB,TUBA1B                         |
| PI3K/AKT Signaling                                          | 0.56 | 0.02 | HSP90B1,HSP90AB1,HSP90AA1                  |
| Glyoxylate and Dicarboxylate Metabolism                     | 0.55 | 0.01 | MTHFD1                                     |
| Calcium Signaling                                           | 0.55 | 0.02 | TPM1 (includes EG:22003),HDAC1,ACTC1,ACTA1 |
| NRF2-mediated Oxidative Stress Response                     | 0.52 | 0.02 | ACTB,ACTC1,ACTG1,ACTA1                     |
| Role of Lipids/Lipid Rafts in the Pathogenesis of Influenza | 0.51 | 0.04 | FDPS                                       |
| Antiproliferative Role of TOB in T Cell Signaling           | 0.48 | 0.04 | CDK2                                       |

|                                                                      |      |      |                              |
|----------------------------------------------------------------------|------|------|------------------------------|
| Regulation of IL-2 Expression in Activated and Anergic T Lymphocytes | 0.46 | 0.02 | FYN,RAC1                     |
| Sonic Hedgehog Signaling                                             | 0.44 | 0.03 | CDK1                         |
| B Cell Receptor Signaling                                            | 0.41 | 0.02 | RAC2,RAC1,LYN                |
| CDK5 Signaling                                                       | 0.41 | 0.02 | CDK5,GNAL                    |
| Glycolysis/Gluconeogenesis                                           | 0.41 | 0.02 | PKM2,Gapdh (includes others) |
| Urea Cycle and Metabolism of Amino Groups                            | 0.41 | 0.01 | GLUD1                        |
| Bladder Cancer Signaling                                             | 0.40 | 0.02 | FGFR3,CDK4                   |
| PAK Signaling                                                        | 0.40 | 0.02 | CFL1,RAC1                    |
| Apoptosis Signaling                                                  | 0.40 | 0.02 | DIABLO,CDK1                  |
| Aminoacyl-tRNA Biosynthesis                                          | 0.40 | 0.01 | VARS                         |
| Inhibition of Angiogenesis by TSP1                                   | 0.39 | 0.03 | FYN                          |
| CTLA4 Signaling in Cytotoxic T Lymphocytes                           | 0.38 | 0.02 | FYN,LCK                      |
| cAMP-mediated signaling                                              | 0.38 | 0.02 | GNAI2,GNAO1,GNAI1,GNAL       |
| Nitrogen Metabolism                                                  | 0.37 | 0.01 | GLUD1                        |
| Glioma Signaling                                                     | 0.36 | 0.02 | CDK4,CDK6                    |
| Glutamate Metabolism                                                 | 0.35 | 0.01 | GLUD1                        |
| Systemic Lupus Erythematosus Signaling                               | 0.35 | 0.02 | LCK,HNRNPA2B1,LYN,HNRNPC     |
| Amyotrophic Lateral Sclerosis Signaling                              | 0.34 | 0.02 | RAC1,SSR4                    |
| HGF Signaling                                                        | 0.34 | 0.02 | RAC1,CDK2                    |
| Cholecystokinin/Gastrin-mediated Signaling                           | 0.33 | 0.02 | GNA12,GNA13                  |
| FcγRIIB Signaling in B Lymphocytes                                   | 0.33 | 0.02 | LYN                          |
| Rac Signaling                                                        | 0.32 | 0.02 | CFL1,RAC1                    |
| Melanoma Signaling                                                   | 0.32 | 0.02 | CDK4                         |
| Wnt/β-catenin Signaling                                              | 0.32 | 0.02 | GNAO1,HDAC1,RUVBL2           |
| iCOS-iCOSL Signaling in T Helper Cells                               | 0.31 | 0.02 | LCK,RAC1                     |
| p38 MAPK Signaling                                                   | 0.31 | 0.02 | HIST3H3,H3F3C                |
| Role of Oct4 in Mammalian Embryonic Stem Cell Pluripotency           | 0.30 | 0.02 | PHB                          |
| Renin-Angiotensin Signaling                                          | 0.30 | 0.02 | RAC1,GNAL                    |
| GABA Receptor Signaling                                              | 0.28 | 0.02 | NSF                          |
| Gα12/13 Signaling                                                    | 0.26 | 0.02 | GNA12,GNA13                  |
| Amyloid Processing                                                   | 0.26 | 0.02 | CDK5                         |
| Primary Immunodeficiency Signaling                                   | 0.25 | 0.02 | LCK                          |
| IL-2 Signaling                                                       | 0.25 | 0.02 | LCK                          |
| Lymphotoxin β Receptor Signaling                                     | 0.24 | 0.02 | DIABLO                       |
| Nur77 Signaling in T Lymphocytes                                     | 0.24 | 0.02 | HDAC1                        |
| Death Receptor Signaling                                             | 0.22 | 0.02 | DIABLO                       |
| Butanoate Metabolism                                                 | 0.22 | 0.01 | HMGCS2                       |
| Role of BRCA1 in DNA Damage Response                                 | 0.22 | 0.02 | RPA1                         |
| Lysine Degradation                                                   | 0.22 | 0.01 | SHMT2                        |
| Antiproliferative Role of Somatostatin Receptor 2                    | 0.20 | 0.01 | GNB2L1                       |

**Table S5: Ingenuity Pathway Analysis**

Canonical Pathways represented by Rad23b interacting partners common to I11 and fetal liver E13.5dpc cells as calculated by Ingenuity Pathway Analysis. Corresponds to Figure S2.
